# Supplementary material for: Vertical Metabolome Transfer from Mother to Child: An Explainable Machine Learning Method for Detecting Metabolomic Heritability
Source: MDPI journal article supplement (doi:10.3390/metabo14030136), 2024-02-24
Supplement: s1 [file s1]

## Supplementary materials

### Vertical metabolome transfer from mother to child: an explainable machine learning method for detecting metabolomic heritability

Mario Lovric, David Horner, Liang Chen, Nicklas Brustad, Ann-Marie Malby Schoos, Jessica Lasky-Su, Bo Chawes, Morten Arendt Rasmussen

Table S1. List of metabolites which entered the models (N=679).

|    | Column1                                                                      | Column2                                                                          | Column3                                                                       | Column4                                                                 |
|----|------------------------------------------------------------------------------|----------------------------------------------------------------------------------|-------------------------------------------------------------------------------|-------------------------------------------------------------------------|
| 0  | linoleate (18:2n6)_Long Chain Polyunsaturated Fatty Acid (n3 and n6)_Lipid   | allantoin_Purine Metabolism, (Hypo)Xanthine/Inosine containing_Nucleotide        | arachidonate (20:4n6)_Long Chain Polyunsaturated Fatty Acid (n3 and n6)_Lipid | arachidate (20:0)_Long Chain Saturated Fatty Acid_Lipid                 |
| 1  | myo-inositol_Inositol Metabolism_Lipid                                       | isoleucine_Leucine, Isoleucine and Valine Metabolism_Amino Acid                  | alanine_Alanine and Aspartate Metabolism_Amino Acid                           | 3-methoxytyrosine_Tyrosine Metabolism_Amino Acid                        |
| 2  | beta-hydroxyisovalerate_Leucine, Isoleucine and Valine Metabolism_Amino Acid | threonine_Glycine, Serine and Threonine Metabolism_Amino Acid                    | tyrosine_Tyrosine Metabolism_Amino Acid                                       | lysine_Lysine Metabolism_Amino Acid                                     |
| 3  | methionine_Methionine, Cysteine, SAM and Taurine Metabolism_Amino Acid       | malate_TCA Cycle_Energy                                                          | nonadecanoate (19:0)_Long Chain Saturated Fatty Acid_Lipid                    | stearate (18:0)_Long Chain Saturated Fatty Acid_Lipid                   |
| 4  | pentadecanoate (15:0)_Long Chain Saturated Fatty Acid_Lipid                  | myristate (14:0)_Long Chain Saturated Fatty Acid_Lipid                           | kynurenate_Tryptophan Metabolism_Amino Acid                                   | 5,6-dihydrothymine_Pyrimidine Metabolism, Thymine containing_Nucleotide |
| 5  | 5-methylthioadenosine (MTA)_Polyamine Metabolism_Amino Acid                  | succinate_TCA Cycle_Energy                                                       | ornithine_Urea cycle; Arginine and Proline Metabolism_Amino Acid              | 5-oxoproline_Glutathione Metabolism_Amino Acid                          |
| 6  | N6,N6,N6-trimethyllysine_Lysine Metabolism_Amino Acid                        | pantothenate (Vitamin B5)_Pantothenate and CoA Metabolism_Cofactors and Vitamins | picolinate_Tryptophan Metabolism_Amino Acid                                   | glycerol_Glycerolipid Metabolism_Lipid                                  |
| 7  | kynurenine_Tryptophan Metabolism_Amino Acid                                  | sarcosine_Glycine, Serine and Threonine Metabolism_Amino Acid                    | tartarate_Food Component/Plant_Xenobiotics                                    | glucuronate_Aminosugar Metabolism_Carbohydrate                          |
| 8  | 3-hydroxyisobutyrate_Leucine, Isoleucine and Valine Metabolism_Amino Acid    | carnitine_Carnitine Metabolism_Lipid                                             | choline_Phospholipid Metabolism_Lipid                                         | 4-acetamidobutanoate_Polyamine Metabolism_Amino Acid                    |
| 9  | alpha-tocopherol_Tocopherol Metabolism_Cofactors and Vitamins                | chenodeoxycholate_Primary Bile Acid Metabolism_Lipid                             | citrate_TCA Cycle_Energy                                                      | 1-methyladenosine_Purine Metabolism, Adenine containing_Nucleotide      |
| 10 | 3-aminoisobutyrate_Pyrimidine Metabolism, Thymine containing_Nucleotide      | vanillylmandelate (VMA)_Tyrosine Metabolism_Amino Acid                           | 3-methyl-2-oxovalerate_Leucine, Isoleucine and Valine Metabolism_Amino Acid   | 3-methylhistidine_Histidine Metabolism_Amino Acid                       |
| 11 | xanthurenate_Tryptophan Metabolism_Amino Acid                                | 4-guanidinobutanoate_Guanidino and Acetamido Metabolism_Amino Acid               | 5-hydroxylysine_Lysine Metabolism_Amino Acid                                  | imidazole lactate_Histidine Metabolism_Amino Acid                       |
| 12 | glycerate_Glycolysis, Gluconeogenesis, and Pyruvate Metabolism_Carbohydrate  | N-acetylglutamate_Glutamate Metabolism_Amino Acid                                | methylsuccinate_Leucine, Isoleucine and Valine Metabolism_Amino Acid          | 3-phenylpropionate (hydrocinnamate)_Benzoate Metabolism_Xenobiotics     |

|    |                                                                                                  |                                                                                         |                                                                                                  |                                                                                                             |
|----|--------------------------------------------------------------------------------------------------|-----------------------------------------------------------------------------------------|--------------------------------------------------------------------------------------------------|-------------------------------------------------------------------------------------------------------------|
| 13 | hippurate_Benzoate<br>Metabolism_Xenobiotics                                                     | ethylmalonate_Leucine,<br>Isoleucine and Valine<br>Metabolism_Amino Acid                | ribitol_Pentose<br>Metabolism_Carbohydrate                                                       | N-acetylalanine_Alanine and<br>Aspartate<br>Metabolism_Amino Acid                                           |
| 14 | glycerophosphorylcholine<br>(GPC)_Phospholipid<br>Metabolism_Lipid                               | phosphoethanolamine<br>(PE)_Phospholipid<br>Metabolism_Lipid                            | urate_Purine Metabolism,<br>(Hypo)Xanthine/Inosine<br>containing_Nucleotide                      | arginine_Urea cycle; Arginine<br>and Proline<br>Metabolism_Amino Acid                                       |
| 15 | caprate (10:0)_Medium<br>Chain Fatty Acid_Lipid                                                  | fumarate_TCA Cycle_Energy                                                               | heptanoate (7:0)_Medium<br>Chain Fatty Acid_Lipid                                                | serine_Glycine, Serine and<br>Threonine<br>Metabolism_Amino Acid                                            |
| 16 | valine_Leucine, Isoleucine<br>and Valine<br>Metabolism_Amino Acid                                | 4-<br>hydroxyphenylpyruvate_Tyrosi<br>ne Metabolism_Amino Acid                          | urea_Urea cycle; Arginine<br>and Proline<br>Metabolism_Amino Acid                                | cortisol_Corticosteroids_Lipi<br>d                                                                          |
| 17 | cortisone_Corticosteroids_L<br>ipid                                                              | sphingosine_Sphingosines_Lipi<br>d                                                      | dihomolinoleate<br>(20:2n6)_Long Chain<br>Polyunsaturated Fatty Acid<br>(n3 and n6)_Lipid        | 2-hydroxystearate_Fatty<br>Acid, Monohydroxy_Lipid                                                          |
| 18 | retinol (Vitamin A)_Vitamin<br>A Metabolism_Cofactors<br>and Vitamins                            | gamma-<br>glutamylhistidine_Gamma-<br>glutamyl Amino Acid_Peptide                       | quinat_Food<br>Component/Plant_Xenobioti<br>cs                                                   | indolelactate_Tryptophan<br>Metabolism_Amino Acid                                                           |
| 19 | azelate (C9-DC)_Fatty Acid,<br>Dicarboxylate_Lipid                                               | cys-gly, oxidized_Glutathione<br>Metabolism_Amino Acid                                  | gamma-<br>glutamylleucine_Gamma-<br>glutamyl Amino Acid_Peptide                                  | methionine<br>sulfoxide_Methionine,<br>Cysteine, SAM and Taurine<br>Metabolism_Amino Acid                   |
| 20 | theobromine_Xanthine<br>Metabolism_Xenobiotics                                                   | theophylline_Xanthine<br>Metabolism_Xenobiotics                                         | eicosapentaenoate (EPA;<br>20:5n3)_Long Chain<br>Polyunsaturated Fatty Acid<br>(n3 and n6)_Lipid | glycocholate_Primary Bile<br>Acid Metabolism_Lipid                                                          |
| 21 | taurochenodeoxycholate_P<br>rimary Bile Acid<br>Metabolism_Lipid                                 | taurocholate_Primary Bile Acid<br>Metabolism_Lipid                                      | cysteine_Methionine,<br>Cysteine, SAM and Taurine<br>Metabolism_Amino Acid                       | proline_Urea cycle; Arginine<br>and Proline<br>Metabolism_Amino Acid                                        |
| 22 | quinolinate_Nicotinate and<br>Nicotinamide<br>Metabolism_Cofactors and<br>Vitamins               | 1,2-dipalmitoyl-GPC<br>(16:0/16:0)_Phosphatidylcholin<br>e (PC)_Lipid                   | 1-myristoyl-2-palmitoyl-GPC<br>(14:0/16:0)_Phosphatidylcholin<br>e (PC)_Lipid                    | 1-palmitoyl-2-oleoyl-GPE<br>(16:0/18:1)_Phosphatidyleth<br>anolamine (PE)_Lipid                             |
| 23 | 1-stearoyl-2-oleoyl-GPS<br>(18:0/18:1)_Phosphatidylse<br>rine (PS)_Lipid                         | 1-stearoyl-GPI<br>(18:0)_Lysophospholipid_Lipid                                         | stearoyl sphingomyelin<br>(d18:1/18:0)_Sphingomyelins<br>_Lipid                                  | 1,5-anhydroglucitol (1,5-<br>AG)_Glycolysis,<br>Gluconeogenesis, and<br>Pyruvate<br>Metabolism_Carbohydrate |
| 24 | maleate_Fatty Acid,<br>Dicarboxylate_Lipid                                                       | tartronate<br>(hydroxymalonate)_Food<br>Component/Plant_Xenobiotics                     | oxalate<br>(ethanedioate)_Ascorbate<br>and Aldarate<br>Metabolism_Cofactors and<br>Vitamins      | iminodiacetate<br>(IDA)_Chemical_Xenobiotics                                                                |
| 25 | 2-oleoylglycerol<br>(18:1)_Monoacylglycerol_Li<br>pid                                            | taurine_Methionine, Cysteine,<br>SAM and Taurine<br>Metabolism_Amino Acid               | citrulline_Urea cycle;<br>Arginine and Proline<br>Metabolism_Amino Acid                          | 3-hydroxyoctanoate_Fatty<br>Acid, Monohydroxy_Lipid                                                         |
| 26 | 3-hydroxydecanoate_Fatty<br>Acid, Monohydroxy_Lipid                                              | 4-methyl-2-<br>oxopentanoate_Leucine,<br>Isoleucine and Valine<br>Metabolism_Amino Acid | phenyllactate<br>(PLA)_Phenylalanine<br>Metabolism_Amino Acid                                    | alpha-<br>hydroxyisocaproate_Leucine,<br>Isoleucine and Valine<br>Metabolism_Amino Acid                     |
| 27 | homoarginine_Urea cycle;<br>Arginine and Proline<br>Metabolism_Amino Acid                        | homocitrulline_Urea cycle;<br>Arginine and Proline<br>Metabolism_Amino Acid             | EDTA_Chemical_Xenobiotics                                                                        | cysteine s-<br>sulfate_Methionine,<br>Cysteine, SAM and Taurine<br>Metabolism_Amino Acid                    |
| 28 | gamma-<br>glutamylglutamine_Gamma<br>-glutamyl Amino<br>Acid_Peptide                             | gamma-<br>glutamyltyrosine_Gamma-<br>glutamyl Amino Acid_Peptide                        | indoleacetate_Tryptophan<br>Metabolism_Amino Acid                                                | thyroxine_Tyrosine<br>Metabolism_Amino Acid                                                                 |
| 29 | 1-<br>methylnicotinamide_Nicoti<br>nate and Nicotinamide<br>Metabolism_Cofactors and<br>Vitamins | 3-indoxyl sulfate_Tryptophan<br>Metabolism_Amino Acid                                   | N-acetylglycine_Glycine,<br>Serine and Threonine<br>Metabolism_Amino Acid                        | creatine_Creatine<br>Metabolism_Amino Acid                                                                  |

|    |                                                                                   |                                                                                                  |                                                                                         |                                                                                    |
|----|-----------------------------------------------------------------------------------|--------------------------------------------------------------------------------------------------|-----------------------------------------------------------------------------------------|------------------------------------------------------------------------------------|
| 30 | galactonate_Fructose, Mannose and Galactose Metabolism_Carbohydrate               | ribonate_Pentose Metabolism_Carbohydrate                                                         | threonate_Ascorbate and Aldarate Metabolism_Cofactors and Vitamins                      | N-formylmethionine_Methionine, Cysteine, SAM and Taurine Metabolism_Amino Acid     |
| 31 | hypoxanthine_Purine Metabolism, (Hypo)Xanthine/Inosine containing_Nucleotide      | betaine_Glycine, Serine and Threonine Metabolism_Amino Acid                                      | xanthine_Purine Metabolism, (Hypo)Xanthine/Inosine containing_Nucleotide                | N-(2-furoyl)glycine_Food Component/Plant_Xenobiotics                               |
| 32 | 3-ureidopropionate_Pyrimidine Metabolism, Uracil containing_Nucleotide            | androsterone sulfate_Androgenic Steroids_Lipid                                                   | 3-carboxy-4-methyl-5-propyl-2-furanpropanoate (CMPF)_Fatty Acid, Dicarboxylate_Lipid    | 3-(4-hydroxyphenyl)lactate (HPLA)_Tyrosine Metabolism_Amino Acid                   |
| 33 | acetylcarnitine (C2)_Fatty Acid Metabolism (Acyl Carnitine, Short Chain)_Lipid    | hydroxyproline_Urea cycle; Arginine and Proline Metabolism_Amino Acid                            | hexanoylcarnitine (C6)_Fatty Acid Metabolism (Acyl Carnitine, Medium Chain)_Lipid       | glycochenodeoxycholate_Primary Bile Acid Metabolism_Lipid                          |
| 34 | 4-imidazoleacetate_Histidine Metabolism_Amino Acid                                | 1-methyl-4-imidazoleacetate_Histidine Metabolism_Amino Acid                                      | N-acetylneuraminate_Aminosugar Metabolism_Carbohydrate                                  | dodecanedioate (C12)_Fatty Acid, Dicarboxylate_Lipid                               |
| 35 | 3-hydroxy-2-methylpropionate_Leucine, Isoleucine and Valine Metabolism_Amino Acid | trigonelline (N'-methylnicotinate)_Nicotinate and Nicotinamide Metabolism_Cofactors and Vitamins | indolepropionate_Tryptophan Metabolism_Amino Acid                                       | docosadienoate (22:2n6)_Long Chain Polyunsaturated Fatty Acid (n3 and n6)_Lipid    |
| 36 | myristoleate (14:1n5)_Long Chain Monounsaturated Fatty Acid_Lipid                 | dehydroepiandrosterone sulfate (DHEA-S)_Androgenic Steroids_Lipid                                | propionylcarnitine (C3)_Fatty Acid Metabolism (also BCAA Metabolism)_Lipid              | 3-hydroxylaurate_Fatty Acid, Monohydroxy_Lipid                                     |
| 37 | caproate (6:0)_Medium Chain Fatty Acid_Lipid                                      | 10-undecenoate (11:1n1)_Medium Chain Fatty Acid_Lipid                                            | docosapentaenoate (DPA; 22:5n3)_Long Chain Polyunsaturated Fatty Acid (n3 and n6)_Lipid | 2-linoleoylglycerol (18:2)_Monoacylglycerol_Lipid                                  |
| 38 | phenol sulfate_Tyrosine Metabolism_Amino Acid                                     | pregnen-diol disulfate*_Pregnenolone Steroids_Lipid                                              | X - 11261_NA_NA                                                                         | bilirubin (E,E)*_Hemoglobin and Porphyrin Metabolism_Cofactors and Vitamins        |
| 39 | glycochenolate sulfate*_Secondary Bile Acid Metabolism_Lipid                      | pregnenediol sulfate (C21H34O5S)*_Pregnenolone Steroids_Lipid                                    | glycolithocholate sulfate*_Secondary Bile Acid Metabolism_Lipid                         | taurochenolate sulfate*_Secondary Bile Acid Metabolism_Lipid                       |
| 40 | andro steroid monosulfate C19H28O6S (1)*_Androgenic Steroids_Lipid                | adrenate (22:4n6)_Long Chain Polyunsaturated Fatty Acid (n3 and n6)_Lipid                        | X - 11787_NA_NA                                                                         | X - 11795_NA_NA                                                                    |
| 41 | 1-arachidonoyl-GPC* (20:4)*_Lysophospholipid_Lipid                                | 1-palmitoleoyl-GPC* (16:1)*_Lysophospholipid_Lipid                                               | gamma-glutamylthreonine_Gamma-glutamyl Amino Acid_Peptide                               | gamma-glutamylphenylalanine_Gamma-glutamyl Amino Acid_Peptide                      |
| 42 | isobutyrylcarnitine (C4)_Leucine, Isoleucine and Valine Metabolism_Amino Acid     | pseudouridine_Pyrimidine Metabolism, Uracil containing_Nucleotide                                | palmitoleate (16:1n7)_Long Chain Monounsaturated Fatty Acid_Lipid                       | eicosenoate (20:1n9 or 1n11)_Long Chain Monounsaturated Fatty Acid_Lipid           |
| 43 | gamma-glutamyl-epsilon-lysine_Gamma-glutamyl Amino Acid_Peptide                   | piperine_Food Component/Plant_Xenobiotics                                                        | N-acetylthreonine_Glycine, Serine and Threonine Metabolism_Amino Acid                   | decanoylcarnitine (C10)_Fatty Acid Metabolism (Acyl Carnitine, Medium Chain)_Lipid |
| 44 | N-acetylglutamine_Glutamate Metabolism_Amino Acid                                 | N-acetylhistidine_Histidine Metabolism_Amino Acid                                                | gamma-glutamyltryptophan_Gamma-glutamyl Amino Acid_Peptide                              | gamma-glutamylglycine_Gamma-glutamyl Amino Acid_Peptide                            |
| 45 | N-acetylphenylalanine_Phenylalanine Metabolism_Amino Acid                         | myristoylcarnitine (C14)_Fatty Acid Metabolism (Acyl Carnitine, Long Chain Saturated)_Lipid      | N-acetylarginine_Urea cycle; Arginine and Proline Metabolism_Amino Acid                 | 1-palmitoyl-GPC (16:0)_Lysophospholipid_Lipid                                      |

|    |                                                                                 |                                                                                            |                                                                                     |                                                                                          |
|----|---------------------------------------------------------------------------------|--------------------------------------------------------------------------------------------|-------------------------------------------------------------------------------------|------------------------------------------------------------------------------------------|
| 46 | N-acetyltryptophan_Tryptophan Metabolism_Amino Acid                             | 1-stearoyl-GPC (18:0)_Lysophospholipid_Lipid                                               | 10-nonadecenoate (19:1n9)_Long Chain Monounsaturated Fatty Acid_Lipid               | campesterol_Sterol_Lipid                                                                 |
| 47 | hyocholate_Secondary Bile Acid Metabolism_Lipid                                 | 1-arachidonoyl-GPI* (20:4)*_Lysophospholipid_Lipid                                         | stachydrine_Food Component/Plant_Xenobiotics                                        | phosphocholine_Phospholipid Metabolism_Lipid                                             |
| 48 | isovalerylcarnitine (C5)_Leucine, Isoleucine and Valine Metabolism_Amino Acid   | stearoylcarnitine (C18)_Fatty Acid Metabolism (Acyl Carnitine, Long Chain Saturated)_Lipid | 1-linoleoyl-GPC (18:2)_Lysophospholipid_Lipid                                       | 1-palmitoyl-GPA (16:0)_Lysophospholipid_Lipid                                            |
| 49 | sphingosine 1-phosphate_Sphingosines_Lipid                                      | laurylcarnitine (C12)_Fatty Acid Metabolism (Acyl Carnitine, Medium Chain)_Lipid           | isovalerylglycine_Leucine, Isoleucine and Valine Metabolism_Amino Acid              | 7-methylguanine_Purine Metabolism, Guanine containing_Nucleotide                         |
| 50 | phenylacetylglutamine_Acetylated Peptides_Peptide                               | prolylhydroxyproline_Urea cycle; Arginine and Proline Metabolism_Amino Acid                | N4-acetylcytidine_Pyrimidine Metabolism, Cytidine containing_Nucleotide             | 5-methyluridine (ribothymidine)_Pyrimidine Metabolism, Uracil containing_Nucleotide      |
| 51 | N2,N2-dimethylguanosine_Purine Metabolism, Guanine containing_Nucleotide        | N6-carbamoylthreonyladenosine_Purine Metabolism, Adenine containing_Nucleotide             | oleoylcarnitine (C18)_Fatty Acid Metabolism (Acyl Carnitine, Monounsaturated)_Lipid | 1-arachidonoyl-GPE (20:4n6)*_Lysophospholipid_Lipid                                      |
| 52 | 2-palmitoyl-GPC* (16:0)*_Lysophospholipid_Lipid                                 | 1-palmitoyl-GPI* (16:0)_Lysophospholipid_Lipid                                             | catechol sulfate_Benzoate Metabolism_Xenobiotics                                    | tiglyl carnitine (C5)_Leucine, Isoleucine and Valine Metabolism_Amino Acid               |
| 53 | isobutyrylglycine (C4)_Leucine, Isoleucine and Valine Metabolism_Amino Acid     | 4-hydroxyhippurate_Benzoate Metabolism_Xenobiotics                                         | 1-oleoyl-GPE (18:1)_Lysophospholipid_Lipid                                          | 1-palmitoyl-GPE (16:0)_Lysophospholipid_Lipid                                            |
| 54 | N-acetyl-aspartyl-glutamate (NAAG)_Glutamate Metabolism_Amino Acid              | tetradecanedioate (C14)_Fatty Acid, Dicarboxylate_Lipid                                    | hexadecanedioate (C16)_Fatty Acid, Dicarboxylate_Lipid                              | dihomolinolenate (20:3n3 or 3n6)_Long Chain Polyunsaturated Fatty Acid (n3 and n6)_Lipid |
| 55 | thymol sulfate_Food Component/Plant_Xenobiotics                                 | 4-vinylphenol sulfate_Benzoate Metabolism_Xenobiotics                                      | 4-ethylphenyl sulfate_Benzoate Metabolism_Xenobiotics                               | p-cresol sulfate_Benzoate Metabolism_Xenobiotics                                         |
| 56 | 1-linoleoyl-GPI* (18:2)*_Lysophospholipid_Lipid                                 | 1-linoleoyl-GPE (18:2)*_Lysophospholipid_Lipid                                             | 1-oleoyl-GPI (18:1)_Lysophospholipid_Lipid                                          | gamma-glutamylglutamate_Gamma-glutamyl Amino Acid_Peptide                                |
| 57 | 2-hydroxy-3-methylvalerate_Leucine, Isoleucine and Valine Metabolism_Amino Acid | deoxycarnitine_Carnitine Metabolism_Lipid                                                  | N6-acetyllysine_Lysine Metabolism_Amino Acid                                        | octadecanedioate (C18)_Fatty Acid, Dicarboxylate_Lipid                                   |
| 58 | 7-HOCA_Sterol_Lipid                                                             | dimethylarginine (ADMA + SDMA)_Urea cycle; Arginine and Proline Metabolism_Amino Acid      | tauroolithocholate 3-sulfate_Secondary Bile Acid Metabolism_Lipid                   | succinylcarnitine (C4-DC)_TCA Cycle_Energy                                               |
| 59 | gamma-glutamylalanine_Gamma-glutamyl Amino Acid_Peptide                         | N-acetylserine_Glycine, Serine and Threonine Metabolism_Amino Acid                         | gamma-glutamyl-2-aminobutyrate_Gamma-glutamyl Amino Acid_Peptide                    | tryptophan betaine_Tryptophan Metabolism_Amino Acid                                      |
| 60 | 4-allylphenol sulfate_Food Component/Plant_Xenobiotics                          | 5alpha-pregnan-3beta,20alpha-diol disulfate_Progestin Steroids_Lipid                       | 5alpha-pregnan-3beta,20alpha-diol monosulfate (2)_Progestin Steroids_Lipid          | androstenediol (3beta,17beta) disulfate (1)_Androgenic Steroids_Lipid                    |
| 61 | androstenediol (3beta,17beta) disulfate (2)_Androgenic Steroids_Lipid           | androstenediol (3alpha,17alpha) monosulfate (3)_Androgenic Steroids_Lipid                  | N-acetyl-beta-alanine_Pyrimidine Metabolism, Uracil containing_Nucleotide           | glycerophosphoethanolamine_Phospholipid Metabolism_Lipid                                 |
| 62 | ergothioneine_Food Component/Plant_Xenobiotics                                  | docosapentaenoate (n6 DPA; 22:5n6)_Long Chain Polyunsaturated Fatty Acid (n3 and n6)_Lipid | N-acetylputrescine_Polyamine Metabolism_Amino Acid                                  | palmitoyl sphingomyelin (d18:1/16:0)_Sphingomyelin_Lipid                                 |

|    |                                                                                             |                                                                                                  |                                                                         |                                                                             |
|----|---------------------------------------------------------------------------------------------|--------------------------------------------------------------------------------------------------|-------------------------------------------------------------------------|-----------------------------------------------------------------------------|
| 63 | sphingomyelin (d18:1/18:1, d18:2/18:0)_Sphingomyelins_Lipid                                 | 13-HODE + 9-HODE_Fatty Acid, Monohydroxy_Lipid                                                   | 4-cholesten-3-one_Sterol_Lipid                                          | 16a-hydroxy DHEA 3-sulfate_Androgenic Steroids_Lipid                        |
| 64 | pregnenolone sulfate_Pregnenolone Steroids_Lipid                                            | cis-4-decenoylcarnitine (C10:1)_Fatty Acid Metabolism (Acyl Carnitine, Monounsaturated)_Lipid    | pristanate_Fatty Acid, Branched_Lipid                                   | 2,3-dihydroxyisovalerate_Food Component/Plant_Xenobiotics                   |
| 65 | (16 or 17)-methylstearate (a19:0 or i19:0)_Fatty Acid, Branched_Lipid                       | 12,13-DiHOME_Fatty Acid, Dihydroxy_Lipid                                                         | 9,10-DiHOME_Fatty Acid, Dihydroxy_Lipid                                 | cinnamoylglycine_Food Component/Plant_Xenobiotics                           |
| 66 | (14 or 15)-methylpalmitate (a17:0 or i17:0)_Fatty Acid, Branched_Lipid                      | 1-(1-enyl-palmitoyl)-GPE (P-16:0)*_Lysoplasmalogen_Lipid                                         | 1-(1-enyl-stearoyl)-GPE (P-18:0)*_Lysoplasmalogen_Lipid                 | glycoursodeoxycholate_Secondary Bile Acid Metabolism_Lipid                  |
| 67 | S-methylcysteine_Methionine, Cysteine, SAM and Taurine Metabolism_Amino Acid                | glutarate (C5-DC)_Fatty Acid, Dicarboxylate_Lipid                                                | 16-hydroxypalmitate_Fatty Acid, Monohydroxy_Lipid                       | eicosanedioate (C20-DC)_Fatty Acid, Dicarboxylate_Lipid                     |
| 68 | docosadioate (C22-DC)_Fatty Acid, Dicarboxylate_Lipid                                       | carboxyethyl-GABA_Glutamate Metabolism_Amino Acid                                                | isoleucylglycine_Dipeptide_Peptide                                      | 4-hydroxy-2-oxoglutaric acid_Fatty Acid, Dicarboxylate_Lipid                |
| 69 | trimethylamine N-oxide_Phospholipid Metabolism_Lipid                                        | N1-Methyl-2-pyridone-5-carboxamide_Nicotinate and Nicotinamide Metabolism_Cofactors and Vitamins | hydantoin-5-propionate_Histidine Metabolism_Amino Acid                  | 4-hydroxyglutamate_Glutamate Metabolism_Amino Acid                          |
| 70 | butyrate/isobutyrate (4:0)_Short Chain Fatty Acid_Lipid                                     | 2-stearoyl-GPE (18:0)*_Lysophospholipid_Lipid                                                    | lanthionine_Methionine, Cysteine, SAM and Taurine Metabolism_Amino Acid | N-palmitoylglycine_Fatty Acid Metabolism (Acyl Glycine)_Lipid               |
| 71 | phosphate_Oxidative Phosphorylation_Energy                                                  | 5-1-pyrroline-5-carboxylate_Glutamate Metabolism_Amino Acid                                      | 2-aminobutyrate_Glutathione Metabolism_Amino Acid                       | 1-stearoyl-GPE (18:0)_Lysophospholipid_Lipid                                |
| 72 | erythronate*_Aminosugar Metabolism_Carbohydrate                                             | 1-palmitoyl-2-linoleoyl-GPC (16:0/18:2)_Phosphatidylcholine (PC)_Lipid                           | 1-stearoyl-2-oleoyl-GPE (18:0/18:1)_Phosphatidylethanolamine (PE)_Lipid | 1-palmitoyl-2-linoleoyl-GPE (16:0/18:2)_Phosphatidylethanolamine (PE)_Lipid |
| 73 | 1-stearoyl-2-arachidonoyl-GPC (18:0/20:4)_Phosphatidylcholine (PC)_Lipid                    | sphingomyelin (d18:2/16:0, d18:1/16:1)*_Sphingomyelins_Lipid                                     | sphingomyelin (d18:1/14:0, d16:1/16:0)*_Sphingomyelins_Lipid            | 2-hydroxydecanoate_Fatty Acid, Monohydroxy_Lipid                            |
| 74 | glycorychololate_Secondary Bile Acid Metabolism_Lipid                                       | 6-oxopiperidine-2-carboxylate_Lysine Metabolism_Amino Acid                                       | 2-aminophenol sulfate_Chemical_Xenobiotics                              | 2-aminooctanoate_Fatty Acid, Amino_Lipid                                    |
| 75 | S-methylcysteine sulfoxide_Methionine, Cysteine, SAM and Taurine Metabolism_Amino Acid      | 2-piperidinone_Food Component/Plant_Xenobiotics                                                  | dimethyl sulfone_Chemical_Xenobiotics                                   | N-acetylcarnosine_Histidine Metabolism_Amino Acid                           |
| 76 | formiminoglutamate_Histidine Metabolism_Amino Acid                                          | N-formylanthranilic acid_Tryptophan Metabolism_Amino Acid                                        | 5-(galactosylhydroxy)-L-lysine_Lysine Metabolism_Amino Acid             | 2-aminoheptanoate_Fatty Acid, Amino_Lipid                                   |
| 77 | guanidinoacetate_Creatine Metabolism_Amino Acid                                             | bilirubin_Hemoglobin and Porphyrin Metabolism_Cofactors and Vitamins                             | gamma-glutamylvaline_Gamma-glutamyl Amino Acid_Peptide                  | glycerol 3-phosphate_Glycerolipid Metabolism_Lipid                          |
| 78 | 3-methyl-2-oxobutyrate_Leucine, Isoleucine and Valine Metabolism_Amino Acid                 | 1-(1-enyl-oleoyl)-GPE (P-18:1)*_Lysoplasmalogen_Lipid                                            | isovalerate (C5)_Leucine, Isoleucine and Valine Metabolism_Amino Acid   | glutaryl carnitine (C5-DC)_Lysine Metabolism_Amino Acid                     |
| 79 | palmitoylcarnitine (C16)_Fatty Acid Metabolism (Acyl Carnitine, Long Chain Saturated)_Lipid | gamma-glutamylmethionine_Gamma-glutamyl Amino Acid_Peptide                                       | gamma-CEHC_Tocopherol Metabolism_Cofactors and Vitamins                 | N-palmitoyl-sphingosine (d18:1/16:0)_Ceramides_Lipid                        |
| 80 | methionine sulfone_Methionine, Cysteine, SAM and Taurine Metabolism_Amino Acid              | 2-methylbutyrylcarnitine (C5)_Leucine, Isoleucine and Valine Metabolism_Amino Acid               | O-sulfo-L-tyrosine_Chemical_Xenobiotics                                 | 1-linolenoyl-GPC (18:3)*_Lysophospholipid_Lipid                             |

|     |                                                                                                    |                                                                                           |                                                                                                |                                                                                                       |
|-----|----------------------------------------------------------------------------------------------------|-------------------------------------------------------------------------------------------|------------------------------------------------------------------------------------------------|-------------------------------------------------------------------------------------------------------|
| 81  | 1-oleoyl-GPG<br>(18:1)*_Lysophospholipid_L<br>lipid                                                | 1-palmitoyl-GPG<br>(16:0)*_Lysophospholipid_L<br>lipid                                    | guaiacol sulfate_Benzoate<br>Metabolism_Xenobiotics                                            | 21-hydroxypregnenolone<br>disulfate_Pregnenolone<br>Steroids_Lipid                                    |
| 82  | mannitol/sorbitol_Fructose,<br>Mannose and Galactose<br>Metabolism_Carbohydrate                    | 4-methylcatechol<br>sulfate_Benzoate<br>Metabolism_Xenobiotics                            | 3-methyl catechol sulfate<br>(1)_Benzoate<br>Metabolism_Xenobiotics                            | aconitate [cis or trans]_TCA<br>Cycle_Energy                                                          |
| 83  | linoleoylcarnitine<br>(C18:2)*_Fatty Acid<br>Metabolism (Acyl Carnitine,<br>Polyunsaturated)_Lipid | pyroglutamine*_Glutamate<br>Metabolism_Amino Acid                                         | X - 21258_NA_NA                                                                                | X - 15486_NA_NA                                                                                       |
| 84  | X - 15461_NA_NA                                                                                    | X - 21286_NA_NA                                                                           | X - 21310_NA_NA                                                                                | X - 11441_NA_NA                                                                                       |
| 85  | X - 21319_NA_NA                                                                                    | X - 21339_NA_NA                                                                           | X - 11308_NA_NA                                                                                | X - 21353_NA_NA                                                                                       |
| 86  | X - 21364_NA_NA                                                                                    | X - 13866_NA_NA                                                                           | X - 21383_NA_NA                                                                                | X - 21410_NA_NA                                                                                       |
| 87  | X - 11444_NA_NA                                                                                    | X - 21441_NA_NA                                                                           | X - 21448_NA_NA                                                                                | X - 11850_NA_NA                                                                                       |
| 88  | X - 21467_NA_NA                                                                                    | X - 21470_NA_NA                                                                           | X - 21471_NA_NA                                                                                | alpha-<br>hydroxyisovalerate_Leucine,<br>Isoleucine and Valine<br>Metabolism_Amino Acid               |
| 89  | N-acetylglucosamine/N-<br>acetylgalactosamine_Amino<br>sugar<br>Metabolism_Carbohydrate            | 3-methylglutaryl carnitine<br>(2)_Leucine, Isoleucine and<br>Valine Metabolism_Amino Acid | X - 11299_NA_NA                                                                                | X - 11372_NA_NA                                                                                       |
| 90  | X - 11470_NA_NA                                                                                    | X - 11478_NA_NA                                                                           | X - 11530_NA_NA                                                                                | X - 11880_NA_NA                                                                                       |
| 91  | X - 12007_NA_NA                                                                                    | X - 12216_NA_NA                                                                           | X - 12462_NA_NA                                                                                | X - 12524_NA_NA                                                                                       |
| 92  | X - 12729_NA_NA                                                                                    | X - 12798_NA_NA                                                                           | X - 14056_NA_NA                                                                                | X - 12844_NA_NA                                                                                       |
| 93  | X - 15469_NA_NA                                                                                    | X - 13728_NA_NA                                                                           | X - 14939_NA_NA                                                                                | X - 15245_NA_NA                                                                                       |
| 94  | X - 16935_NA_NA                                                                                    | X - 16944_NA_NA                                                                           | X - 16964_NA_NA                                                                                | X - 18779_NA_NA                                                                                       |
| 95  | X - 18913_NA_NA                                                                                    | X - 18922_NA_NA                                                                           | X - 19141_NA_NA                                                                                | X - 17653_NA_NA                                                                                       |
| 96  | X - 17654_NA_NA                                                                                    | X - 21736_NA_NA                                                                           | X - 12104_NA_NA                                                                                | gulonate*_Ascorbate and<br>Aldarate<br>Metabolism_Cofactors and<br>Vitamins                           |
| 97  | sulfate*_Chemical_Xenobio<br>tics                                                                  | X - 17676_NA_NA                                                                           | X - 15503_NA_NA                                                                                | X - 12193_NA_NA                                                                                       |
| 98  | X - 21829_NA_NA                                                                                    | N-<br>methylpipecolate_Bacterial/Fu<br>ngal_Xenobiotics                                   | ferulic acid 4-sulfate_Food<br>Component/Plant_Xenobioti<br>cs                                 | 2-palmitoleoyl-GPC*<br>(16:1)*_Lysophospholipid_Li<br>pid                                             |
| 99  | 9-hydroxystearate_Fatty<br>Acid, Monohydroxy_Lipid                                                 | sphingomyelin (d18:1/24:1,<br>d18:2/24:0)*_Sphingomyelins_<br>Lipid                       | sphingomyelin (d18:2/14:0,<br>d18:1/14:1)*_Sphingomyelin<br>s_Lipid                            | X - 18887_NA_NA                                                                                       |
| 100 | X - 22162_NA_NA                                                                                    | X - 12680_NA_NA                                                                           | X - 12101_NA_NA                                                                                | X - 18899_NA_NA                                                                                       |
| 101 | X - 18921_NA_NA                                                                                    | X - 12100_NA_NA                                                                           | X - 12112_NA_NA                                                                                | X - 13431_NA_NA                                                                                       |
| 102 | X - 16397_NA_NA                                                                                    | X - 16580_NA_NA                                                                           | bilirubin (E,Z or<br>Z,E)*_Hemoglobin and<br>Porphyrin<br>Metabolism_Cofactors and<br>Vitamins | X - 12026_NA_NA                                                                                       |
| 103 | X - 12221_NA_NA                                                                                    | X - 12906_NA_NA                                                                           | X - 13553_NA_NA                                                                                | X - 17351_NA_NA                                                                                       |
| 104 | X - 17357_NA_NA                                                                                    | X - 22771_NA_NA                                                                           | mannose_Fructose, Mannose<br>and Galactose<br>Metabolism_Carbohydrate                          | myristoleoylcarnitine<br>(C14:1)*_Fatty Acid<br>Metabolism (Acyl Carnitine,<br>Monounsaturated)_Lipid |
| 105 | N-<br>acetyltaurine_Methionine,<br>Cysteine, SAM and Taurine<br>Metabolism_Amino Acid              | fructose_Fructose, Mannose<br>and Galactose<br>Metabolism_Carbohydrate                    | arabonate/xylonate_Pentose<br>Metabolism_Carbohydrate                                          | 1-oleoyl-GPC<br>(18:1)_Lysophospholipid_Lipi<br>d                                                     |
| 106 | 1-dihomo-linolenylglycerol<br>(20:3)_Monoacylglycerol_Li<br>pid                                    | N1-methylinosine_Purine<br>Metabolism,<br>(Hypo)Xanthine/Inosine<br>containing_Nucleotide | dopamine 3-O-<br>sulfate_Tyrosine<br>Metabolism_Amino Acid                                     | tyramine O-sulfate_Tyrosine<br>Metabolism_Amino Acid                                                  |
| 107 | pyrraline_Food<br>Component/Plant_Xenobioti<br>cs                                                  | 4-<br>hydroxychlorothalonil_Chemica<br>l_Xenobiotics                                      | 4-vinylguaiacol sulfate_Food<br>Component/Plant_Xenobioti<br>cs                                | 3-hydroxypyridine<br>sulfate_Chemical_Xenobiotic<br>s                                                 |

|     |                                                                                 |                                                                                    |                                                                                   |                                                                             |
|-----|---------------------------------------------------------------------------------|------------------------------------------------------------------------------------|-----------------------------------------------------------------------------------|-----------------------------------------------------------------------------|
| 108 | 4-methoxyphenol sulfate_Tyrosine Metabolism_Amino Acid                          | sphingomyelin (d18:1/20:0, d16:1/22:0)*_Sphingomyelins_Lipid                       | sphingomyelin (d18:1/20:1, d18:2/20:0)*_Sphingomyelins_Lipid                      | behenoyl sphingomyelin (d18:1/22:0)*_Sphingomyelins_Lipid                   |
| 109 | sphingomyelin (d18:1/22:1, d18:2/22:0, d16:1/24:1)*_Sphingomyelins_Lipid        | 3-methoxycatechol sulfate (1)_Benzoate Metabolism_Xenobiotics                      | C-glycosyltryptophan_Tryptophan Metabolism_Amino Acid                             | glycerophosphoglycerol_Glycerolipid Metabolism_Lipid                        |
| 110 | arabitol/xylitol_Pentose Metabolism_Carbohydrate                                | X - 23593_NA_NA                                                                    | X - 23636_NA_NA                                                                   | X - 23639_NA_NA                                                             |
| 111 | X - 23665_NA_NA                                                                 | X - 23666_NA_NA                                                                    | X - 23680_NA_NA                                                                   | X - 11315_NA_NA                                                             |
| 112 | 1-lignoceroyl-GPC (24:0)_Lysophospholipid_Lipid                                 | X - 23739_NA_NA                                                                    | alpha-ketobutyrate_Methionine, Cysteine, SAM and Taurine Metabolism_Amino Acid    | X - 23782_NA_NA                                                             |
| 113 | dimethylglycine_Glycine, Serine and Threonine Metabolism_Amino Acid             | asparagine_Alanine and Aspartate Metabolism_Amino Acid                             | creatinine_Creatine Metabolism_Amino Acid                                         | X - 23997_NA_NA                                                             |
| 114 | glycosyl-N-stearoyl-sphingosine (d18:1/18:0)_Hexosylceramides (HCER)_Lipid      | 2-hydroxybutyrate/2-hydroxyisobutyrate_Glutathione Metabolism_Amino Acid           | X - 24243_NA_NA                                                                   | 1-palmitoleoylglycerol (16:1)*_Monoacylglycerol_Lipid                       |
| 115 | sphingomyelin (d17:1/16:0, d18:1/15:0, d16:1/17:0)*_Sphingomyelins_Lipid        | palmitoyl dihydrosphingomyelin (d18:0/16:0)*_Dihydrosphingomyelins_Lipid           | sphingomyelin (d18:2/23:0, d18:1/23:1, d17:1/24:1)*_Sphingomyelins_Lipid          | tricosanoyl sphingomyelin (d18:1/23:0)*_Sphingomyelins_Lipid                |
| 116 | sphingomyelin (d18:2/24:1, d18:1/24:2)*_Sphingomyelins_Lipid                    | 1-stearoyl-2-oleoyl-GPC (18:0/18:1)_Phosphatidylcholine (PC)_Lipid                 | 1-stearoyl-2-arachidonoyl-GPE (18:0/20:4)_Phosphatidylethanolamine (PE)_Lipid     | 1-stearoyl-2-arachidonoyl-GPI (18:0/20:4)_Phosphatidylinositol (PI)_Lipid   |
| 117 | 1-palmitoyl-2-linoleoyl-GPI (16:0/18:2)_Phosphatidylinositol (PI)_Lipid         | 1-stearoyl-2-linoleoyl-GPC (18:0/18:2)*_Phosphatidylcholine (PC)_Lipid             | 1-palmitoyl-2-oleoyl-GPC (16:0/18:1)_Phosphatidylcholine (PC)_Lipid               | 1-palmitoyl-2-arachidonoyl-GPC (16:0/20:4n6)_Phosphatidylcholine (PC)_Lipid |
| 118 | 1-palmitoyl-2-arachidonoyl-GPE (16:0/20:4)*_Phosphatidylethanolamine (PE)_Lipid | 1-palmitoyl-2-docosahexaenoyl-GPE (16:0/22:6)*_Phosphatidylethanolamine (PE)_Lipid | 1-stearoyl-2-docosahexaenoyl-GPE (18:0/22:6)*_Phosphatidylethanolamine (PE)_Lipid | 1-palmitoyl-2-arachidonoyl-GPI (16:0/20:4)*_Phosphatidylinositol (PI)_Lipid |
| 119 | 1-stearoyl-2-linoleoyl-GPI (18:0/18:2)_Phosphatidylinositol (PI)_Lipid          | 1-palmitoyl-2-palmitoleoyl-GPC (16:0/16:1)*_Phosphatidylcholine (PC)_Lipid         | gamma-tocopherol/beta-tocopherol_Tocopherol Metabolism_Cofactors and Vitamins     | 1-(1-enyl-palmitoyl)-GPC (P-16:0)*_Lysoplasmalogen_Lipid                    |
| 120 | 1-(1-enyl-stearoyl)-2-arachidonoyl-GPE (P-18:0/20:4)*_Plasmalogen_Lipid         | 1-(1-enyl-palmitoyl)-2-oleoyl-GPE (P-16:0/18:1)*_Plasmalogen_Lipid                 | 1-(1-enyl-palmitoyl)-2-oleoyl-GPC (P-16:0/18:1)*_Plasmalogen_Lipid                | X - 24295_NA_NA                                                             |
| 121 | sphingomyelin (d18:1/21:0, d17:1/22:0, d16:1/23:0)*_Sphingomyelins_Lipid        | X - 24307_NA_NA                                                                    | X - 24337_NA_NA                                                                   | 1,2-dilinoeloyl-GPC (18:2/18:2)_Phosphatidylcholine (PC)_Lipid              |
| 122 | N-palmitoyl-sphinganine (d18:0/16:0)_Dihydroceramides_Lipid                     | sphinganine-1-phosphate_Sphingolipid Synthesis_Lipid                               | 1-palmitoyl-2-docosahexaenoyl-GPC (16:0/22:6)_Phosphatidylcholine (PC)_Lipid      | 1-stearoyl-2-docosahexaenoyl-GPC (18:0/22:6)_Phosphatidylcholine (PC)_Lipid |
| 123 | 1-(1-enyl-stearoyl)-2-oleoyl-GPE (P-18:0/18:1)_Plasmalogen_Lipid                | sphingomyelin (d18:1/17:0, d17:1/18:0, d19:1/16:0)_Sphingomyelins_Lipid            | 1-palmitoyl-2-stearoyl-GPC (16:0/18:0)_Phosphatidylcholine (PC)_Lipid             | X - 24431_NA_NA                                                             |
| 124 | X - 24432_NA_NA                                                                 | 1-palmitoyl-2-oleoyl-GPI (16:0/18:1)*_Phosphatidylinositol (PI)_Lipid              | 1-(1-enyl-palmitoyl)-2-arachidonoyl-GPE (P-16:0/20:4)*_Plasmalogen_Lipid          | 1-(1-enyl-palmitoyl)-2-linoleoyl-GPE (P-16:0/18:2)*_Plasmalogen_Lipid       |
| 125 | 1-(1-enyl-palmitoyl)-2-linoleoyl-GPC (P-                                        | 1-oleoyl-2-linoleoyl-GPE (18:1/18:2)*_Phosphatidylethanolamine (PE)_Lipid          | 1-(1-enyl-palmitoyl)-2-arachidonoyl-GPC (P-                                       | 1-linoleoyl-GPA (18:2)*_Lysophospholipid_Lipid                              |

|     |                                                                                              |                                                                                      |                                                                                              |                                                                                                                |
|-----|----------------------------------------------------------------------------------------------|--------------------------------------------------------------------------------------|----------------------------------------------------------------------------------------------|----------------------------------------------------------------------------------------------------------------|
|     | 16:0/18:2)*_Plasmalogen_Lipid                                                                |                                                                                      | 16:0/20:4)*_Plasmalogen_Lipid                                                                |                                                                                                                |
| 126 | 1-oleoyl-2-docosa-hexaenoyl-GPC (18:1/22:6)*_Phosphatidylcholine (PC)_Lipid                  | lactate_Glycolysis, Gluconeogenesis, and Pyruvate Metabolism_Carbohydrate            | 1-linoleoyl-2-arachidonoyl-GPC (18:2/20:4n6)*_Phosphatidylcholine (PC)_Lipid                 | 1-(1-enyl-palmitoyl)-2-palmitoleoyl-GPC (P-16:0/16:1)*_Plasmalogen_Lipid                                       |
| 127 | 1-(1-enyl-palmitoyl)-2-palmitoyl-GPC (P-16:0/16:0)*_Plasmalogen_Lipid                        | 1-stearoyl-2-oleoyl-GPI (18:0/18:1)*_Phosphatidylinositol (PI)_Lipid                 | 1-(1-enyl-stearoyl)-2-linoleoyl-GPE (P-18:0/18:2)*_Plasmalogen_Lipid                         | X - 24455_NA_NA                                                                                                |
| 128 | X - 24473_NA_NA                                                                              | alpha-ketoglutarate_TCA Cycle_Energy                                                 | X - 24544_NA_NA                                                                              | X - 24545_NA_NA                                                                                                |
| 129 | X - 24556_NA_NA                                                                              | X - 24588_NA_NA                                                                      | 2-hydroxylaurate_Fatty Acid, Monohydroxy_Lipid                                               | palmitoylcholine_Fatty Acid Metabolism (Acyl Choline)_Lipid                                                    |
| 130 | glycochenodeoxycholate 3-sulfate_Primary Bile Acid Metabolism_Lipid                          | glycodeoxycholate 3-sulfate_Secondary Bile Acid Metabolism_Lipid                     | glycochenodeoxycholate glucuronide (1)_Primary Bile Acid Metabolism_Lipid                    | (S)-3-hydroxybutyrylcarnitine_Fatty Acid Metabolism (Acyl Carnitine, Hydroxy)_Lipid                            |
| 131 | N1,N12-diacetylspermine_Polyamine Metabolism_Amino Acid                                      | adipoylcarnitine (C6-DC)_Fatty Acid Metabolism (Acyl Carnitine, Dicarboxylate)_Lipid | glutamine_Glutamate Metabolism_Amino Acid                                                    | lactosyl-N-palmitoyl-sphingosine (d18:1/16:0)_Lactosylceramides (LCER)_Lipid                                   |
| 132 | glycosyl-N-palmitoyl-sphingosine (d18:1/16:0)_Hexosylceramides (HCER)_Lipid                  | 3-hydroxy-3-methylglutarate_Mevalonate Metabolism_Lipid                              | X - 24728_NA_NA                                                                              | 1-linoleoyl-2-linolenoyl-GPC (18:2/18:3)*_Phosphatidylcholine (PC)_Lipid                                       |
| 133 | 1-palmitoleoyl-2-linolenoyl-GPC (16:1/18:3)*_Phosphatidylcholine (PC)_Lipid                  | 1-myristoyl-2-arachidonoyl-GPC (14:0/20:4)*_Phosphatidylcholine (PC)_Lipid           | palmitoleoylcarnitine (C16:1)*_Fatty Acid Metabolism (Acyl Carnitine, Monounsaturated)_Lipid | pimeloylcarnitine/3-methyladipoylcarnitine (C7-DC)_Fatty Acid Metabolism (Acyl Carnitine, Dicarboxylate)_Lipid |
| 134 | 3-hydroxyhexanoate_Fatty Acid, Monohydroxy_Lipid                                             | thioprolin_Chemical_Xenobiotics                                                      | caffeic acid sulfate_Food Component/Plant_Xenobiotics                                        | tryptophan_Tryptophan Metabolism_Amino Acid                                                                    |
| 135 | 3-hydroxybutyrate (BHBA)_Ketone Bodies_Lipid                                                 | 3beta-hydroxy-5-cholestenoate_Sterol_Lipid                                           | 1-linoleoyl-GPG (18:2)*_Lysophospholipid_Lipid                                               | vanillactate_Tyrosine Metabolism_Amino Acid                                                                    |
| 136 | diacylglycerol (16:1/18:2 [2], 16:0/18:3 [1])*_Diacylglycerol_Lipid                          | palmitoleoyl-linoleoyl-glycerol (16:1/18:2) [1]*_Diacylglycerol_Lipid                | N-stearoyl-sphingosine (d18:1/18:0)*_Ceramides_Lipid                                         | beta-alanine_Pyrimidine Metabolism, Uracil containing_Nucleotide                                               |
| 137 | gamma-glutamyl-alpha-lysine_Gamma-glutamyl Amino Acid_Peptide                                | 2-oxoarginine*_Urea cycle; Arginine and Proline Metabolism_Amino Acid                | phenylpyruvate_Phenylalanine Metabolism_Amino Acid                                           | glutamate_Glutamate Metabolism_Amino Acid                                                                      |
| 138 | lignoceroyl sphingomyelin (d18:1/24:0)_Sphingomyelins_Lipid                                  | behenoyl dihydrosphingomyelin (d18:0/22:0)*_Dihydrosphingomyelins_Lipid              | myristoyl dihydrosphingomyelin (d18:0/14:0)*_Dihydrosphingomyelins_Lipid                     | lactosyl-N-nervonoyl-sphingosine (d18:1/24:1)*_Lactosylceramides (LCER)_Lipid                                  |
| 139 | N-behenoyl-sphingadienine (d18:2/22:0)*_Ceramides_Lipid                                      | palmitoyl-docosa-hexaenoyl-glycerol (16:0/22:6) [1]*_Diacylglycerol_Lipid            | N-palmitoyl-sphingadienine (d18:2/16:0)*_Ceramides_Lipid                                     | lactosyl-N-behenoyl-sphingosine (d18:1/22:0)*_Lactosylceramides (LCER)_Lipid                                   |
| 140 | ceramide (d18:1/14:0, d16:1/16:0)*_Ceramides_Lipid                                           | ceramide (d16:1/24:1, d18:1/22:1)*_Ceramides_Lipid                                   | ceramide (d18:1/20:0, d16:1/22:0, d20:1/18:0)*_Ceramides_Lipid                               | ceramide (d18:2/24:1, d18:1/24:2)*_Ceramides_Lipid                                                             |
| 141 | glycosyl-N-(2-hydroxynervonoyl)-sphingosine (d18:1/24:1(2OH))*_Hexosylceramides (HCER)_Lipid | glycosyl ceramide (d18:2/24:1, d18:1/24:2)*_Hexosylceramides (HCER)_Lipid            | argininate*_Urea cycle; Arginine and Proline Metabolism_Amino Acid                           | sphingomyelin (d18:0/18:0, d19:0/17:0)*_Dihydrosphingomyelins_Lipid                                            |
| 142 | sphingomyelin (d18:2/18:1)*_Sphingomyelins_Lipid                                             | sphingomyelin (d18:1/19:0, d19:1/18:0)*_Sphingomyelins_Lipid                         | sphingomyelin (d18:1/22:2, d18:2/22:1,                                                       | sphingomyelin (d18:1/25:0, d19:0/24:1, d20:1/23:0,                                                             |



|     |                                                                                                                    |                                                                                                           |                                                                                                                   |                                                                                                           |
|-----|--------------------------------------------------------------------------------------------------------------------|-----------------------------------------------------------------------------------------------------------|-------------------------------------------------------------------------------------------------------------------|-----------------------------------------------------------------------------------------------------------|
|     |                                                                                                                    |                                                                                                           | d16:1/24:2)*_Sphingomyelin<br>s_Lipid                                                                             | d19:1/24:0)*_Sphingomyelin<br>s_Lipid                                                                     |
| 143 | sphingomyelin<br>(d18:2/24:2)*_Sphingomyelin<br>s_Lipid                                                            | sphingomyelin (d18:2/21:0,<br>d16:2/23:0)*_Sphingomyelin<br>s_Lipid                                       | sphingomyelin (d18:1/20:2,<br>d18:2/20:1,<br>d16:1/22:2)*_Sphingomyelin<br>s_Lipid                                | sphingomyelin (d17:2/16:0,<br>d18:2/15:0)*_Sphingomyelin<br>s_Lipid                                       |
| 144 | arabinose_Pentose<br>Metabolism_Carbohydrate                                                                       | margaroylcarnitine<br>(C17)*_Fatty Acid Metabolism<br>(Acyl Carnitine, Long Chain<br>Saturated)_Lipid     | arachidoylecarnitine<br>(C20)*_Fatty Acid<br>Metabolism (Acyl Carnitine,<br>Long Chain Saturated)_Lipid           | behenoylcarnitine<br>(C22)*_Fatty Acid<br>Metabolism (Acyl Carnitine,<br>Long Chain Saturated)_Lipid      |
| 145 | lignoceroylecarnitine<br>(C24)*_Fatty Acid<br>Metabolism (Acyl Carnitine,<br>Long Chain Saturated)_Lipid           | cerotoylecarnitine (C26)*_Fatty<br>Acid Metabolism (Acyl<br>Carnitine, Long Chain<br>Saturated)_Lipid     | ximenoylcarnitine<br>(C26:1)*_Fatty Acid<br>Metabolism (Acyl Carnitine,<br>Monounsaturated)_Lipid                 | arachidonoylcarnitine<br>(C20:4)_Fatty Acid<br>Metabolism (Acyl Carnitine,<br>Polyunsaturated)_Lipid      |
| 146 | eicosenoylcarnitine<br>(C20:1)*_Fatty Acid<br>Metabolism (Acyl Carnitine,<br>Monounsaturated)_Lipid                | dihomo-linoleoylcarnitine<br>(C20:2)*_Fatty Acid<br>Metabolism (Acyl Carnitine,<br>Polyunsaturated)_Lipid | dihomo-linolenoylcarnitine<br>(C20:3n3 or 6)*_Fatty Acid<br>Metabolism (Acyl Carnitine,<br>Polyunsaturated)_Lipid | nervonoylcarnitine<br>(C24:1)*_Fatty Acid<br>Metabolism (Acyl Carnitine,<br>Monounsaturated)_Lipid        |
| 147 | 2'-O-<br>methylcytidine_Pyrimidine<br>Metabolism, Cytidine<br>containing_Nucleotide                                | perfluorooctanesulfonate<br>(PFOS)_Chemical_Xenobiotics                                                   | beta-cryptoxanthin_Vitamin<br>A Metabolism_Cofactors and<br>Vitamins                                              | carotene diol (1)_Vitamin A<br>Metabolism_Cofactors and<br>Vitamins                                       |
| 148 | carotene diol (2)_Vitamin A<br>Metabolism_Cofactors and<br>Vitamins                                                | carotene diol (3)_Vitamin A<br>Metabolism_Cofactors and<br>Vitamins                                       | hexadecadienoate<br>(16:2n6)_Long Chain<br>Polyunsaturated Fatty Acid<br>(n3 and n6)_Lipid                        | N-<br>palmitoylserine_Endocannab<br>inoid_Lipid                                                           |
| 149 | 2-hydroxybehenate_Fatty<br>Acid, Monohydroxy_Lipid                                                                 | N-<br>oleoylserine_Endocannabinoid<br>Lipid                                                               | N,N,N-trimethyl-5-<br>aminovalerate_Lysine<br>Metabolism_Amino Acid                                               | X - 24947_NA_NA                                                                                           |
| 150 | X - 24951_NA_NA                                                                                                    | 3-methylglutaconate_Leucine,<br>Isoleucine and Valine<br>Metabolism_Amino Acid                            | X - 24970_NA_NA                                                                                                   | nisinate (24:6n3)_Long Chain<br>Polyunsaturated Fatty Acid<br>(n3 and n6)_Lipid                           |
| 151 | (N(1) + N(8))-<br>acetylspermidine_Polyamin<br>e Metabolism_Amino Acid                                             | glycine_Glycine, Serine and<br>Threonine Metabolism_Amino<br>Acid                                         | gluconate_Food<br>Component/Plant_Xenobioti<br>cs                                                                 | histidine_Histidine<br>Metabolism_Amino Acid                                                              |
| 152 | hypotaurine_Methionine,<br>Cysteine, SAM and Taurine<br>Metabolism_Amino Acid                                      | phytanate_Food<br>Component/Plant_Xenobiotics                                                             | leucine_Leucine, Isoleucine<br>and Valine<br>Metabolism_Amino Acid                                                | dihydroorotate_Pyrimidine<br>Metabolism, Orotate<br>containing_Nucleotide                                 |
| 153 | uridine_Pyrimidine<br>Metabolism, Uracil<br>containing_Nucleotide                                                  | trans-urocanate_Histidine<br>Metabolism_Amino Acid                                                        | 2-aminoadipate_Lysine<br>Metabolism_Amino Acid                                                                    | 2-hydroxynervonate*_Fatty<br>Acid, Monohydroxy_Lipid                                                      |
| 154 | 2-hydroxyarachidate*_Fatty<br>Acid, Monohydroxy_Lipid                                                              | 5,6-dihydrouridine_Pyrimidine<br>Metabolism, Uracil<br>containing_Nucleotide                              | ribulonate/xylulonate/lyxona<br>te*_Pentose<br>Metabolism_Carbohydrate                                            | octadecadienedioate (C18:2-<br>DC)*_Fatty Acid,<br>Dicarboxylate_Lipid                                    |
| 155 | octadecenedioate (C18:1-<br>DC)_Fatty Acid,<br>Dicarboxylate_Lipid                                                 | hexadecenedioate (C16:1-<br>DC)*_Fatty Acid,<br>Dicarboxylate_Lipid                                       | octadecenedioylecarnitine<br>(C18:1-DC)*_Fatty Acid<br>Metabolism (Acyl Carnitine,<br>Dicarboxylate)_Lipid        | heptenedioate (C7:1-<br>DC)*_Fatty Acid,<br>Dicarboxylate_Lipid                                           |
| 156 | octadecanedioylecarnitine<br>(C18-DC)*_Fatty Acid<br>Metabolism (Acyl Carnitine,<br>Dicarboxylate)_Lipid           | 1-ribosyl-<br>imidazoleacetate*_Histidine<br>Metabolism_Amino Acid                                        | 3-carboxy-4-methyl-5-pentyl-<br>2-furanpropionate (3-<br>CMPFP)_Fatty Acid,<br>Dicarboxylate_Lipid                | glucuronide of C12H22O4<br>(1)*_Partially Characterized<br>Molecules_Partially<br>Characterized Molecules |
| 157 | N-acetyl-2-<br>aminooctanoate*_Fatty<br>Acid, Amino_Lipid                                                          | hydroxyasparagine_Alanine and<br>Aspartate Metabolism_Amino<br>Acid                                       | 3-hydroxystachydrine*_Food<br>Component/Plant_Xenobioti<br>cs                                                     | glyco-beta-<br>muricholate_Primary Bile<br>Acid Metabolism_Lipid                                          |
| 158 | perfluorooctanoate<br>(PFOA)_Chemical_Xenobioti<br>cs                                                              | alpha-<br>ketoglutaminate*_Glutamate<br>Metabolism_Amino Acid                                             | cysteinyglycine<br>disulfide*_Glutathione<br>Metabolism_Amino Acid                                                | gamma-<br>glutamylcitrulline*_Gamma-<br>glutamyl Amino<br>Acid_Peptide                                    |
| 159 | glycine conjugate of<br>C10H14O2 (1)*_Partially<br>Characterized<br>Molecules_Partially<br>Characterized Molecules | X - 25172_NA_NA                                                                                           | sphingomyelin (d17:1/14:0,<br>d16:1/15:0)*_Sphingomyelin<br>s_Lipid                                               | dodecadienoate<br>(12:2)*_Fatty Acid,<br>Dicarboxylate_Lipid                                              |

|     |                                                                                                                                         |                                                                                                              |                                                                                                                                     |                                                                                                                                         |
|-----|-----------------------------------------------------------------------------------------------------------------------------------------|--------------------------------------------------------------------------------------------------------------|-------------------------------------------------------------------------------------------------------------------------------------|-----------------------------------------------------------------------------------------------------------------------------------------|
| 160 | hydroxy-CMPF*_Fatty Acid, Dicarboxylate_Lipid                                                                                           | indoleacetyl carnitine*_Tryptophan Metabolism_Amino Acid                                                     | N-acetyl-isoputrescine_Polyamine Metabolism_Amino Acid                                                                              | 1-carboxyethylvaline_Leucine, Isoleucine and Valine Metabolism_Amino Acid                                                               |
| 161 | 1-carboxyethylphenylalanine Phenylalanine Metabolism_Amino Acid                                                                         | 2,3-dihydroxy-5-methylthio-4-pentenoate (DMTPA)*_Methionine, Cysteine, SAM and Taurine Metabolism_Amino Acid | tetradecadienoate (14:2)*_Long Chain Polyunsaturated Fatty Acid (n3 and n6)_Lipid                                                   | hydroxypalmitoyl sphingomyelin (d18:1/16:0(OH))_Sphingomyelins_Lipid                                                                    |
| 162 | 3-amino-2-piperidone_Urea cycle; Arginine and Proline Metabolism_Amino Acid                                                             | N6-methyllysine_Lysine Metabolism_Amino Acid                                                                 | N6,N6-dimethyllysine_Lysine Metabolism_Amino Acid                                                                                   | cis-4-decenoate (10:1n6)*_Medium Chain Fatty Acid_Lipid                                                                                 |
| 163 | taurochenodeoxycholic acid 3-sulfate_Secondary Bile Acid Metabolism_Lipid                                                               | tridecenedioate (C13:1-DC)*_Fatty Acid, Dicarboxylate_Lipid                                                  | pregnenetriol disulfate*_Pregnenolone Steroids_Lipid                                                                                | pregnenetriol sulfate*_Pregnenolone Steroids_Lipid                                                                                      |
| 164 | eicosenedioate (C20:1-DC)*_Fatty Acid, Dicarboxylate_Lipid                                                                              | 1-methyl-5-imidazoleacetate_Histidine Metabolism_Amino Acid                                                  | hydroxy-N6,N6,N6-trimethyllysine*_Lysine Metabolism_Amino Acid                                                                      | palmitoyl-sphingosine-phosphoethanolamine (d18:1/16:0)_Ceramide PEs_Lipid                                                               |
| 165 | cholesterol_Sterol_Lipid                                                                                                                | 2,6-dihydroxybenzoic acid_Drug - Topical Agents_Xenobiotics                                                  | picolinoylglycine_Fatty Acid Metabolism (Acyl Glycine)_Lipid                                                                        | N,N-dimethylalanine_Alanine and Aspartate Metabolism_Amino Acid                                                                         |
| 166 | ethyl alpha-glucopyranoside_Food Component/Plant_Xenobiotics                                                                            | metabolonic lactone sulfate_Partially Characterized Molecules_Partially Characterized Molecules              | branched chain 14:0 dicarboxylic acid_Fatty Acid, Dicarboxylate_Lipid                                                               | (2 or 3)-decenoate (10:1n7 or n8)_Medium Chain Fatty Acid_Lipid                                                                         |
| 167 | 3-indoleglyoxylic acid_Food Component/Plant_Xenobiotics                                                                                 | deoxycholic acid glucuronide_Secondary Bile Acid Metabolism_Lipid                                            | undecenoylcarnitine (C11:1)_Fatty Acid Metabolism (Acyl Carnitine, Monounsaturated)_Lipid                                           | branched-chain, straight-chain, or cyclopropyl 10:1 fatty acid (1)*_Partially Characterized Molecules_Partially Characterized Molecules |
| 168 | branched-chain, straight-chain, or cyclopropyl 10:1 fatty acid (2)*_Partially Characterized Molecules_Partially Characterized Molecules | glutamine conjugate of C6H10O2 (1)*_Partially Characterized Molecules_Partially Characterized Molecules      | branched-chain, straight-chain, or cyclopropyl 12:1 fatty acid*_Partially Characterized Molecules_Partially Characterized Molecules | vanillic acid glycine_Food Component/Plant_Xenobiotics                                                                                  |
| 169 | 4-chlorobenzoic acid_Chemical_Xenobiotics                                                                                               | 2-O-methylascorbic acid_Ascorbate and Aldarate Metabolism_Cofactors and Vitamins                             | phenylalanine_Phenylalanine Metabolism_Amino Acid                                                                                   | linoleate (18:2n6)_Long Chain Polyunsaturated Fatty Acid (n3 and n6)_Lipid                                                              |

Table S2. The list of 205 metabolites out of the 884, which didn't enter the models.

|    | Column1                                                                     | Column2                                                                                          | Column3                                                                                             | Column4                                                                            |
|----|-----------------------------------------------------------------------------|--------------------------------------------------------------------------------------------------|-----------------------------------------------------------------------------------------------------|------------------------------------------------------------------------------------|
| 0  | inosine_Purine Metabolism, (Hypo)Xanthine/Inosine containing_Nucleotide     | 4-allylcatechol sulfate_Benzoate Metabolism_Xenobiotics                                          | X - 16124_NA_NA                                                                                     | X - 25217_NA_NA                                                                    |
| 1  | X - 21752_NA_NA                                                             | hexanoylglutamine_Fatty Acid Metabolism (Acyl Glutamine)_Lipid                                   | cysteine-glutathione disulfide_Glutathione Metabolism_Amino Acid                                    | 5alpha-pregnan-diol disulfate_Progestin Steroids_Lipid                             |
| 2  | 3-hydroxyhippurate_Benzoate Metabolism_Xenobiotics                          | 4-acetamidophenylglucuronide_Drug - Analgesics, Anesthetics_Xenobiotics                          | androsterone glucuronide_Androgenic Steroids_Lipid                                                  | xylose_Pentose Metabolism_Carbohydrate                                             |
| 3  | X - 11843_NA_NA                                                             | 2-acetamidophenol sulfate_Drug - Analgesics, Anesthetics_Xenobiotics                             | N,N,N-trimethyl-alanylproline betaine (TMAP)_Urea cycle; Arginine and Proline Metabolism_Amino Acid | X - 24546_NA_NA                                                                    |
| 4  | androstenediol (3alpha, 17alpha) monosulfate (2)_Androgenic Steroids_Lipid  | linoleoylcholine*_Fatty Acid Metabolism (Acyl Choline)_Lipid                                     | docosahexaenoylcholine_Fatty Acid Metabolism (Acyl Choline)_Lipid                                   | X - 12544_NA_NA                                                                    |
| 5  | solanidine_Food Component/Plant_Xenobiotics                                 | acesulfame_Food Component/Plant_Xenobiotics                                                      | cytosine_Pyrimidine Metabolism, Cytidine containing_Nucleotide                                      | nonanoylcarnitine (C9)_Fatty Acid Metabolism (Acyl Carnitine, Medium Chain)_Lipid  |
| 6  | X - 17185_NA_NA                                                             | X - 12812_NA_NA                                                                                  | 1,2-dilinoeloyl-GPE (18:2/18:2)*_Phosphatidylethanolamine (PE)_Lipid                                | X - 21796_NA_NA                                                                    |
| 7  | X - 13684_NA_NA                                                             | palmitate (16:0)_Long Chain Saturated Fatty Acid_Lipid                                           | 1,3,7-trimethylurate_Xanthine Metabolism_Xenobiotics                                                | sphingadienine_Sphingolipid Synthesis_Lipid                                        |
| 8  | X - 15728_NA_NA                                                             | gentisate_Tyrosine Metabolism_Amino Acid                                                         | 4-ethylcatechol sulfate_Benzoate Metabolism_Xenobiotics                                             | 2-ketocaprylate_Leucine, Isoleucine and Valine Metabolism_Amino Acid               |
| 9  | X - 12849_NA_NA                                                             | glucuronide of C10H18O2 (7)*_Partially Characterized Molecules_Partially Characterized Molecules | linolenate (18:3n3 or 3n6)_Long Chain Polyunsaturated Fatty Acid (n3 and n6)_Lipid                  | X - 21834_NA_NA                                                                    |
| 10 | 3-methoxycatechol sulfate (2)_Benzoate Metabolism_Xenobiotics               | orotate_Pyrimidine Metabolism, Orotate containing_Nucleotide                                     | X - 17612_NA_NA                                                                                     | 10-heptadecenoate (17:1n7)_Long Chain Monounsaturated Fatty Acid_Lipid             |
| 11 | X - 21742_NA_NA                                                             | X - 24849_NA_NA                                                                                  | margarate (17:0)_Long Chain Saturated Fatty Acid_Lipid                                              | octanoylcarnitine (C8)_Fatty Acid Metabolism (Acyl Carnitine, Medium Chain)_Lipid  |
| 12 | X - 17343_NA_NA                                                             | X - 24571_NA_NA                                                                                  | suberate (C8-DC)_Fatty Acid, Dicarboxylate_Lipid                                                    | stearoylcholine*_Fatty Acid Metabolism (Acyl Choline)_Lipid                        |
| 13 | nicotinamide_Nicotinate and Nicotinamide Metabolism_Cofactors and Vitamins  | glycoursodeoxycholic acid sulfate (1)_Secondary Bile Acid Metabolism_Lipid                       | syringol sulfate_Food Component/Plant_Xenobiotics                                                   | glucuronide of piperine metabolite C17H21NO3 (4)*_Food Component/Plant_Xenobiotics |
| 14 | X - 24699_NA_NA                                                             | tauroursodeoxycholate_Secondary Bile Acid Metabolism_Lipid                                       | eugenol sulfate_Food Component/Plant_Xenobiotics                                                    | lithocholate sulfate (1)_Secondary Bile Acid Metabolism_Lipid                      |
| 15 | 1-stearoyl-2-linoleoyl-GPE (18:0/18:2)*_Phosphatidylethanolamine (PE)_Lipid | 5-acetylamin-6-amino-3-methyluracil_Xanthine Metabolism_Xenobiotics                              | phenylacetylcarnitine_Acetylated Peptides_Peptide                                                   | umbelliferone sulfate_Food Component/Plant_Xenobiotics                             |
| 16 | X - 24549_NA_NA                                                             | 3-methylxanthine_Xanthine Metabolism_Xenobiotics                                                 | oleate/vaccenate (18:1)_Long Chain Monounsaturated Fatty Acid_Lipid                                 | 3-(3-hydroxyphenyl)propionate_Benzoate Metabolism_Xenobiotics                      |

|    |                                                                                        |                                                                                            |                                                                                                  |                                                                                                 |
|----|----------------------------------------------------------------------------------------|--------------------------------------------------------------------------------------------|--------------------------------------------------------------------------------------------------|-------------------------------------------------------------------------------------------------|
| 17 | taurohyocholate*_Secondary Bile Acid Metabolism_Lipid                                  | imidazole propionate_Histidine Metabolism_Amino Acid                                       | N-acetylleucine_Leucine, Isoleucine and Valine Metabolism_Amino Acid                             | X - 21607_NA_NA                                                                                 |
| 18 | 6-hydroxyindole sulfate_Chemical_Xenobiotics                                           | o-cresol sulfate_Benzoate Metabolism_Xenobiotics                                           | deoxycholate_Secondary Bile Acid Metabolism_Lipid                                                | sebacate (C10-DC)_Fatty Acid, Dicarboxylate_Lipid                                               |
| 19 | hydroquinone sulfate_Drug - Topical Agents_Xenobiotics                                 | X - 21803_NA_NA                                                                            | X - 11442_NA_NA                                                                                  | dihydroferulate_Food Component/Plant_Xenobiotics                                                |
| 20 | erythritol_Food Component/Plant_Xenobiotics                                            | linolenoylcarnitine (C18:3)*_Fatty Acid Metabolism (Acyl Carnitine, Polyunsaturated)_Lipid | 1,7-dimethylurate_Xanthine Metabolism_Xenobiotics                                                | suberoylcarnitine (C8-DC)_Fatty Acid Metabolism (Acyl Carnitine, Dicarboxylate)_Lipid           |
| 21 | cysteinylglycine_Glutathione Metabolism_Amino Acid                                     | 5alpha-pregnan-3beta,20beta-diol monosulfate (1)_Progesterin Steroids_Lipid                | maltose_Glycogen Metabolism_Carbohydrate                                                         | X - 11858_NA_NA                                                                                 |
| 22 | 1-methylxanthine_Xanthine Metabolism_Xenobiotics                                       | 3,4-methyleneheptanoate_Food Component/Plant_Xenobiotics                                   | ADSGEGDFXAEAGGVR*_Fibrinogen Cleavage Peptide_Peptide                                            | caffeine_Xanthine Metabolism_Xenobiotics                                                        |
| 23 | sphinganine_Sphingolipid Synthesis_Lipid                                               | ursodeoxycholate_Secondary Bile Acid Metabolism_Lipid                                      | X - 12411_NA_NA                                                                                  | N-acetyl-1-methylhistidine*_Histidine Metabolism_Amino Acid                                     |
| 24 | 5alpha-androstan-3beta,17alpha-diol disulfate_Androgenic Steroids_Lipid                | 2-hydroxypalmitate_Fatty Acid, Monohydroxy_Lipid                                           | X - 23641_NA_NA                                                                                  | chiro-inositol_Inositol Metabolism_Lipid                                                        |
| 25 | epiandrosterone sulfate_Androgenic Steroids_Lipid                                      | X - 21442_NA_NA                                                                            | cholate_Primary Bile Acid Metabolism_Lipid                                                       | N-ethylglycinexylidide_Drug - Analgesics, Anesthetics_Xenobiotics                               |
| 26 | serotonin_Tryptophan Metabolism_Amino Acid                                             | alliin_Food Component/Plant_Xenobiotics                                                    | glycodeoxycholate_Secondary Bile Acid Metabolism_Lipid                                           | X - 11522_NA_NA                                                                                 |
| 27 | aspartate_Alanine and Aspartate Metabolism_Amino Acid                                  | AMP_Purine Metabolism, Adenine containing_Nucleotide                                       | dihomo-linolenoyl-choline_Fatty Acid Metabolism (Acyl Choline)_Lipid                             | X - 11849_NA_NA                                                                                 |
| 28 | 2-hydroxyhippurate (salicylurate)_Benzoate Metabolism_Xenobiotics                      | methyl glucopyranoside (alpha + beta)_Food Component/Plant_Xenobiotics                     | 2-hydroxyacetaminophen sulfate*_Drug - Analgesics, Anesthetics_Xenobiotics                       | docosahexaenoylcarnitine (C22:6)*_Fatty Acid Metabolism (Acyl Carnitine, Polyunsaturated)_Lipid |
| 29 | p-cresol glucuronide*_Tyrosine Metabolism_Amino Acid                                   | paraxanthine_Xanthine Metabolism_Xenobiotics                                               | N-methylproline_Urea cycle; Arginine and Proline Metabolism_Amino Acid                           | X - 18901_NA_NA                                                                                 |
| 30 | 1,2,3-benzenetriol sulfate (2)_Chemical_Xenobiotics                                    | 4-acetamidophenol_Drug - Analgesics, Anesthetics_Xenobiotics                               | glucuronide of C10H18O2 (8)*_Partially Characterized Molecules_Partially Characterized Molecules | (S)-a-amino-omega-caprolactam_Food Component/Plant_Xenobiotics                                  |
| 31 | 2-methoxyacetaminophen sulfate*_Drug - Analgesics, Anesthetics_Xenobiotics             | N6-methyladenosine_Purine Metabolism, Adenine containing_Nucleotide                        | 4-hydroxycoumarin_Drug - Cardiovascular_Xenobiotics                                              | X - 24952_NA_NA                                                                                 |
| 32 | X - 12407_NA_NA                                                                        | N-acetylvaline_Leucine, Isoleucine and Valine Metabolism_Amino Acid                        | caprylate (8:0)_Medium Chain Fatty Acid_Lipid                                                    | X - 12117_NA_NA                                                                                 |
| 33 | docosahexaenoate (DHA; 22:6n3)_Long Chain Polyunsaturated Fatty Acid (n3 and n6)_Lipid | 4-methylguaiaicol sulfate_Benzoate Metabolism_Xenobiotics                                  | X - 12740_NA_NA                                                                                  | vanillic alcohol sulfate_Tyrosine Metabolism_Amino Acid                                         |
| 34 | X - 17690_NA_NA                                                                        | 2-methoxyacetaminophen glucuronide*_Drug - Analgesics, Anesthetics_Xenobiotics             | N-acetylmethionine_Methionine, Cysteine, SAM and Taurine Metabolism_Amino Acid                   | X - 24972_NA_NA                                                                                 |

|    |                                                                                      |                                                                                 |                                                                                     |                                                                                |
|----|--------------------------------------------------------------------------------------|---------------------------------------------------------------------------------|-------------------------------------------------------------------------------------|--------------------------------------------------------------------------------|
| 35 | salicylate_Drug - Topical Agents_Xenobiotics                                         | X - 17348_NA_NA                                                                 | X - 21821_NA_NA                                                                     | isoursodeoxycholate_Secondary Bile Acid Metabolism_Lipid                       |
| 36 | X - 17655_NA_NA                                                                      | X - 24565_NA_NA                                                                 | sphingomyelin (d18:0/20:0, d16:0/22:0)*_Dihydrosphingomyelins_Lipid                 | X - 07765_NA_NA                                                                |
| 37 | orotidine_Pyrimidine Metabolism, Orotate containing_Nucleotide                       | 3-(methylthio)acetaminophen sulfate*_Drug - Analgesics, Anesthetics_Xenobiotics | 1-methylhistidine_Histidine Metabolism_Amino Acid                                   | sphingomyelin (d18:2/23:1)*_Sphingomyelins_Lipid                               |
| 38 | 3-phosphoglycerate_Glycolysis, Gluconeogenesis, and Pyruvate Metabolism_Carbohydrate | beta-citrylglutamate_Glutamate Metabolism_Amino Acid                            | X - 21815_NA_NA                                                                     | N-delta-acetylornithine_Urea cycle; Arginine and Proline Metabolism_Amino Acid |
| 39 | sulfate of piperine metabolite C16H19NO3 (2)*_Food Component/Plant_Xenobiotics       | sulfate of piperine metabolite C16H19NO3 (3)*_Food Component/Plant_Xenobiotics  | DSGEGDFXAEAGGGVR*_Fibrinogen Cleavage Peptide_Peptide                               | 4-acetaminophen sulfate_Drug - Analgesics, Anesthetics_Xenobiotics             |
| 40 | X - 12818_NA_NA                                                                      | cystine_Methionine, Cysteine, SAM and Taurine Metabolism_Amino Acid             | X - 11483_NA_NA                                                                     | X - 12730_NA_NA                                                                |
| 41 | maltol sulfate_Food Component/Plant_Xenobiotics                                      | X - 15674_NA_NA                                                                 | X - 11852_NA_NA                                                                     | saccharin_Food Component/Plant_Xenobiotics                                     |
| 42 | X - 12847_NA_NA                                                                      | 2-hydroxyoctanoate_Fatty Acid, Monohydroxy_Lipid                                | (R)-3-hydroxybutyrylcarnitine_Fatty Acid Metabolism (Acyl Carnitine, Hydroxy)_Lipid | X - 11847_NA_NA                                                                |
| 43 | N-acetylisoleucine_Leucine, Isoleucine and Valine Metabolism_Amino Acid              | lidocaine_Drug - Analgesics, Anesthetics_Xenobiotics                            | 1-linolenoylglycerol (18:3)_Monoacylglycerol_Lipid                                  | 5-acetylamino-6-formylamino-3-methyluracil_Xanthine Metabolism_Xenobiotics     |
| 44 | uracil_Pyrimidine Metabolism, Uracil containing_Nucleotide                           | androstenediol (3beta,17beta) monosulfate (1)_Androgenic Steroids_Lipid         | erucate (22:1n9)_Long Chain Monounsaturated Fatty Acid_Lipid                        | 5-dodecenoate (12:1n7)_Medium Chain Fatty Acid_Lipid                           |
| 45 | glycolithocholate_Secondary Bile Acid Metabolism_Lipid                               | arachidonoylcholine_Fatty Acid Metabolism (Acyl Choline)_Lipid                  | oleoylcholine_Fatty Acid Metabolism (Acyl Choline)_Lipid                            | biliverdin_Hemoglobin and Porphyrin Metabolism_Cofactors and Vitamins          |
| 46 | X - 12127_NA_NA                                                                      | 3-hydroxy-2-methylpyridine sulfate_Chemical_Xenobiotics                         | X - 17328_NA_NA                                                                     | stearidonate (18:4n3)_Long Chain Polyunsaturated Fatty Acid (n3 and n6)_Lipid  |
| 47 | androstenediol (3beta,17beta) monosulfate (2)_Androgenic Steroids_Lipid              | sucrose_Disaccharides and Oligosaccharides_Carbohydrate                         | X - 16946_NA_NA                                                                     | cystathionine_Methionine, Cysteine, SAM and Taurine Metabolism_Amino Acid      |
| 48 | 1-myristoylglycerol (14:0)_Monoacylglycerol_Lipid                                    | N6-carboxymethyllysine_Advanced Glycation End-product_Carbohydrate              | pipecolate_Lysine Metabolism_Amino Acid                                             | pyridoxate_Vitamin B6 Metabolism_Cofactors and Vitamins                        |
| 49 | methyl-4-hydroxybenzoate sulfate_Benzoate Metabolism_Xenobiotics                     | X - 23644_NA_NA                                                                 | S-methylmethionine_Methionine, Cysteine, SAM and Taurine Metabolism_Amino Acid      | tauro-beta-muricholate_Primary Bile Acid Metabolism_Lipid                      |
| 50 | laurate (12:0)_Medium Chain Fatty Acid_Lipid                                         | taurodeoxycholate_Secondary Bile Acid Metabolism_Lipid                          | X - 16576_NA_NA                                                                     | butyrylcarnitine (C4)_Fatty Acid Metabolism (also BCAA Metabolism)_Lipid       |

|    |                                                                        |                                                                         |                                                         |                 |
|----|------------------------------------------------------------------------|-------------------------------------------------------------------------|---------------------------------------------------------|-----------------|
| 51 | 5alpha-androstan-3beta,17beta-diol disulfate_Androgenic Steroids_Lipid | inosine_Purine Metabolism, (Hypo)Xanthine/Inosine containing_Nucleotide | 4-allylcatechol sulfate_Benzoate Metabolism_Xenobiotics | X - 16124_NA_NA |
|----|------------------------------------------------------------------------|-------------------------------------------------------------------------|---------------------------------------------------------|-----------------|

Table S3. Metabolites chosen in each of the final machine learning models.

|    | lgbm (Light GBM)                             | lg (Logistic regression)                                                                        | rf (Random forests)                                                          |
|----|----------------------------------------------|-------------------------------------------------------------------------------------------------|------------------------------------------------------------------------------|
| 0  | X_11308_NA_NA                                | X_24970_NA_NA                                                                                   | X_11308_NA_NA                                                                |
| 1  | X_24970_NA_NA                                | X_11372_NA_NA                                                                                   | perfluorooctanoate_PFOA_Chemical_Xenobiotics                                 |
| 2  | perfluorooctanoate_PFOA_Chemical_Xenobiotics | X_11308_NA_NA                                                                                   | N_acetyl_2_aminooctanoate_Fatty Acid_Amino_Lipid                             |
| 3  | X_24307_NA_NA                                | X_14939_NA_NA                                                                                   | X_24970_NA_NA                                                                |
| 4  | X_11372_NA_NA                                | fructose_Fructose_Mannose and Galactose Metabolism_Carbohydrate                                 | N6_methyllysine_Lysine Metabolism_Amino Acid                                 |
| 5  | X_17653_NA_NA                                | 1_1_etyl_palmitoyl_GPC_P_16_0_Lysoplasmalogen_Lipid                                             | X_23636_NA_NA                                                                |
| 6  | X_12112_NA_NA                                | ferulic acid 4_sulfate_Food Component_Plant_Xenobiotics                                         | methionine sulfone_Methionine_Cysteine_SAM and Taurine Metabolism_Amino Acid |
| 7  |                                              | ribulonate_xylulonate_lyxonate_Pentose Metabolism_Carbohydrate                                  |                                                                              |
| 8  |                                              | X_17676_NA_NA                                                                                   |                                                                              |
| 9  |                                              | X_12680_NA_NA                                                                                   |                                                                              |
| 10 |                                              | 4_vinylguaiacol sulfate_Food Component_Plant_Xenobiotics                                        |                                                                              |
| 11 |                                              | X_11444_NA_NA                                                                                   |                                                                              |
| 12 |                                              | X_24432_NA_NA                                                                                   |                                                                              |
| 13 |                                              | 3_hydroxystachydrine_Food Component_Plant_Xenobiotics                                           |                                                                              |
| 14 |                                              | 1_palmitoyl_2_palmitoleoyl_GPC_P_16_0_16_1_Phosphatidylcholine_PC_Lipid                         |                                                                              |
| 15 |                                              | ethyl alpha_glucopyranoside_Food Component_Plant_Xenobiotics                                    |                                                                              |
| 16 |                                              | 1_2_dilinoleoyl_GPC_P_18_2_18_2_Phosphatidylcholine_PC_Lipid                                    |                                                                              |
| 17 |                                              | metabolonic lactone sulfate_Partially Characterized Molecules_Partially Characterized Molecules |                                                                              |
| 18 |                                              | X_24337_NA_NA                                                                                   |                                                                              |
| 19 |                                              | X_21353_NA_NA                                                                                   |                                                                              |
| 20 |                                              | behenoyl sphingomyelin_d18_1_22_0_Sphingomyelins_Lipid                                          |                                                                              |
| 21 |                                              | 1_1_etyl_palmitoyl_2_linoleoyl_GPC_P_16_0_18_2_Plasmalogen_Lipid                                |                                                                              |
| 22 |                                              | sphingomyelin_d18_1_22_1_d18_2_22_0_d16_1_24_1_Sphingomyelins_Lipid                             |                                                                              |
| 23 |                                              | N_methylpipecolate_Bacterial_Fungal_Xenobiotics                                                 |                                                                              |
| 24 |                                              | 1_lignoceroyl_GPC_P_24_0_Lysophospholipid_Lipid                                                 |                                                                              |
| 25 |                                              | X_21448_NA_NA                                                                                   |                                                                              |

|        |  |                                                                                                                                           |  |
|--------|--|-------------------------------------------------------------------------------------------------------------------------------------------|--|
| 2<br>6 |  | branched_chain_straight_chain_or cyclopropyl 10_1<br>fatty acid_1__Partially Characterized<br>Molecules_Partially Characterized Molecules |  |
| 2<br>7 |  | 1_1_enyl_palmitoyl_2_palmitoyl_GPC<br>P_16_0_16_0__Plasmalogen_Lipid                                                                      |  |
| 2<br>8 |  | X_12524_NA_NA                                                                                                                             |  |
| 2<br>9 |  | octadecenedioylcarnitine_C18_1_DC__Fatty Acid<br>Metabolism_Acyl Carnitine_Dicarboxylate__Lipid                                           |  |
| 3<br>0 |  | 1_stearoyl_2_oleoyl_GPI<br>18_0_18_1__Phosphatidylinositol_PI__Lipid                                                                      |  |
| 3<br>1 |  | creatinine_Creatine Metabolism_Amino Acid                                                                                                 |  |
| 3<br>2 |  | sphingomyelin_d18_1_21_0_d17_1_22_0_<br>d16_1_23_0__Sphingomyelins_Lipid                                                                  |  |
| 3<br>3 |  | X_12112_NA_NA                                                                                                                             |  |
| 3<br>4 |  | X_13728_NA_NA                                                                                                                             |  |
| 3<br>5 |  | X_23636_NA_NA                                                                                                                             |  |
| 3<br>6 |  | X_21410_NA_NA                                                                                                                             |  |
| 3<br>7 |  | 4_methoxyphenol sulfate_Tyrosine<br>Metabolism_Amino Acid                                                                                 |  |
| 3<br>8 |  | X_18922_NA_NA                                                                                                                             |  |
| 3<br>9 |  | X_16397_NA_NA                                                                                                                             |  |
| 4<br>0 |  | alpha_ketobutyrate_Methionine_Cysteine_SAM and<br>Taurine Metabolism_Amino Acid                                                           |  |
| 4<br>1 |  | hypotaurine_Methionine_Cysteine_SAM and Taurine<br>Metabolism_Amino Acid                                                                  |  |
| 4<br>2 |  | 2_hydroxybutyrate_2_hydroxyisobutyrate_Glutathion<br>e Metabolism_Amino Acid                                                              |  |
| 4<br>3 |  | 3_methylglutaconate_Leucine_Isoleucine and Valine<br>Metabolism_Amino Acid                                                                |  |
| 4<br>4 |  | glucuronide of C12H22O4_1__Partially<br>Characterized Molecules_Partially Characterized<br>Molecules                                      |  |
| 4<br>5 |  | octadecenedioate_C18_1_DC__Fatty Acid_<br>Dicarboxylate_Lipid                                                                             |  |
| 4<br>6 |  | octadecadienedioate_C18_2_DC__Fatty Acid_<br>Dicarboxylate_Lipid                                                                          |  |
| 4<br>7 |  | 1_stearoyl_2_linoleoyl_GPC<br>18_0_18_2__Phosphatidylcholine_PC__Lipid                                                                    |  |
| 4<br>8 |  | myristoleoylcarnitine_C14_1__Fatty Acid<br>Metabolism_Acyl Carnitine_<br>Monounsaturated_Lipid                                            |  |
| 4<br>9 |  | X_14056_NA_NA                                                                                                                             |  |
| 5<br>0 |  | X_12729_NA_NA                                                                                                                             |  |
| 5<br>1 |  | 1_oleoyl_GPC_18_1__Lysophospholipid_Lipid                                                                                                 |  |
| 5<br>2 |  | 1_ribosyl_imidazoleacetate__Histidine<br>Metabolism_Amino Acid                                                                            |  |
| 5<br>3 |  | 1_dihomo_linolenylglycerol<br>20_3__Monoacylglycerol_Lipid                                                                                |  |
| 5<br>4 |  | cysteinylglycine disulfide__Glutathione<br>Metabolism_Amino Acid                                                                          |  |
| 5<br>5 |  | X_12100_NA_NA                                                                                                                             |  |

|        |  |                                                                                    |  |
|--------|--|------------------------------------------------------------------------------------|--|
| 5<br>6 |  | arabonate_xylonate_Pentose<br>Metabolism_Carbohydrate                              |  |
| 5<br>7 |  | glycine_Glycine_Serine and Threonine<br>Metabolism_Amino Acid                      |  |
| 5<br>8 |  | 1_1_etyl_palmitoyl_2_palmitoleoyl_GPC<br>P_16_0_16_1_Plasmalogen_Lipid             |  |
| 5<br>9 |  | X_21383_NA_NA                                                                      |  |
| 6<br>0 |  | glycerophosphoglycerol_Glycerolipid<br>Metabolism_Lipid                            |  |
| 6<br>1 |  | 1_palmitoleoylglycerol<br>16_1_Monoacylglycerol_Lipid                              |  |
| 6<br>2 |  | N1_methylinosine_Purine Metabolism_<br>Hypo_Xanthine_Inosine containing_Nucleotide |  |
| 6<br>3 |  | X_11880_NA_NA                                                                      |  |
| 6<br>4 |  | X_11470_NA_NA                                                                      |  |
| 6<br>5 |  | X_21319_NA_NA                                                                      |  |
| 6<br>6 |  | X_24947_NA_NA                                                                      |  |
| 6<br>7 |  | X_12906_NA_NA                                                                      |  |
| 6<br>8 |  | sphingomyelin_d18_1_17_0_d17_1_18_0_<br>d19_1_16_0_Sphingomyelins_Lipid            |  |
| 6<br>9 |  | X_12104_NA_NA                                                                      |  |
| 7<br>0 |  | 1_1_etyl_stearoyl_2_oleoyl_GPE<br>P_18_0_18_1_Plasmalogen_Lipid                    |  |
| 7<br>1 |  | X_23665_NA_NA                                                                      |  |
| 7<br>2 |  | X_22162_NA_NA                                                                      |  |
| 7<br>3 |  | X_13553_NA_NA                                                                      |  |
| 7<br>4 |  | heptenedioate_C7_1_DC_Fatty Acid_<br>Dicarboxylate_Lipid                           |  |



Table S4. Metabolites chosen in each of the final machine learning models without xenobiotics.

|    | lgbm (Light GBM)                                                                       | lg (Logistic regression)                                                     | rf (Random forests)                                                               |
|----|----------------------------------------------------------------------------------------|------------------------------------------------------------------------------|-----------------------------------------------------------------------------------|
| 0  | X_11308_NA_NA                                                                          | X_11308_NA_NA                                                                | X_11308_NA_NA                                                                     |
| 1  | X_24970_NA_NA                                                                          | X_11372_NA_NA                                                                | 3_carboxy_4_methyl_5_propyl_2_furanpropanoate_CMPF_Fatty Acid_Dicarboxylate_Lipid |
| 2  | X_24307_NA_NA                                                                          | X_24970_NA_NA                                                                | X_24970_NA_NA                                                                     |
| 3  | gulonate_Ascorbate and Aldarate Metabolism_Cofactors and Vitamins                      | X_16935_NA_NA                                                                | N6_N6_dimethyllysine_Lysine Metabolism_Amino Acid                                 |
| 4  | N_acetyltaurine_Methionine_Cysteine_SAM and Taurine Metabolism_Amino Acid              | X_11880_NA_NA                                                                | bilirubin_Hemoglobin and Porphyrin Metabolism_Cofactors and Vitamins              |
| 5  | fructose_Fructose_Mannose and Galactose Metabolism_Carbohydrate                        | N6_methyllysine_Lysine Metabolism_Amino Acid                                 | sphingomyelin_d18_1_20_1_d18_2_20_0_Sphingomyelins_Lipid                          |
| 6  | arabonate_xylonate_Pentose Metabolism_Carbohydrate                                     | phenylpyruvate_Phenylalanine Metabolism_Amino Acid                           | 5_methyluridine_ribothymidine_Pyrimidine Metabolism_Uracil containing_Nucleotide  |
| 7  | 1_oleoyl_GPC_18_1_Lysophospholipid_Lipid                                               | gamma_glutamyl_epsilon_lysine_Gamma_glutamyl_Amino Acid_Peptide              |                                                                                   |
| 8  | X_13431_NA_NA                                                                          | hydroxy_CMPF_Fatty Acid_Dicarboxylate_Lipid                                  |                                                                                   |
| 9  | X_12112_NA_NA                                                                          | behenoyl sphingomyelin_d18_1_22_0_Sphingomyelins_Lipid                       |                                                                                   |
| 10 | X_12100_NA_NA                                                                          | 2_palmitoyl_GPC_16_0_Lysophospholipid_Lipid                                  |                                                                                   |
| 11 | X_18921_NA_NA                                                                          | X_23666_NA_NA                                                                |                                                                                   |
| 12 | X_12104_NA_NA                                                                          | N6_N6_dimethyllysine_Lysine Metabolism_Amino Acid                            |                                                                                   |
| 13 | X_17676_NA_NA                                                                          | sphingomyelin_d18_1_22_1_d18_2_22_0_d16_1_24_1_Sphingomyelins_Lipid          |                                                                                   |
| 14 | mannose_Fructose_Mannose and Galactose Metabolism_Carbohydrate                         | X_11441_NA_NA                                                                |                                                                                   |
| 15 | X_15503_NA_NA                                                                          | methionine sulfone_Methionine_Cysteine_SAM and Taurine Metabolism_Amino Acid |                                                                                   |
| 16 | X_12193_NA_NA                                                                          | X_15245_NA_NA                                                                |                                                                                   |
| 17 | X_21829_NA_NA                                                                          | retinol_Vitamin A_Vitamin A Metabolism_Cofactors and Vitamins                |                                                                                   |
| 18 | 2_palmitoleoyl_GPC_16_1_Lysophospholipid_Lipid                                         | 1_linoleoyl_GPG_18_2_Lysophospholipid_Lipid                                  |                                                                                   |
| 19 | 9_hydroxystearate_Fatty Acid_Monohydroxy_Lipid                                         | X_15503_NA_NA                                                                |                                                                                   |
| 20 | sphingomyelin_d18_1_24_1_d18_2_24_0_Sphingomyelins_Lipid                               | glutamate_Glutamate Metabolism_Amino Acid                                    |                                                                                   |
| 21 | sphingomyelin_d18_2_14_0_d18_1_14_1_Sphingomyelins_Lipid                               | dehydroepiandrosterone sulfate_DHEA_S_Androgenic Steroids_Lipid              |                                                                                   |
| 22 | X_18887_NA_NA                                                                          | 4_hydroxyglutamate_Glutamate Metabolism_Amino Acid                           |                                                                                   |
| 23 | X_22162_NA_NA                                                                          | androstenediol_3alpha_17alpha_monosulfate_3_Androgenic Steroids_Lipid        |                                                                                   |
| 24 | X_12680_NA_NA                                                                          | X_12524_NA_NA                                                                |                                                                                   |
| 25 | X_12101_NA_NA                                                                          | X_21364_NA_NA                                                                |                                                                                   |
| 26 | myristoleoylcarnitine_C14_1_Fatty Acid Metabolism_Acyl Carnitine_Monounsaturated_Lipid | 3_amino_2_piperidone_Urea cycle_Arginine and Proline Metabolism_Amino Acid   |                                                                                   |

|    |                                                                                           |                                                                                                            |  |
|----|-------------------------------------------------------------------------------------------|------------------------------------------------------------------------------------------------------------|--|
| 27 | X_22771_NA_NA                                                                             | andro steroid monosulfate<br>C19H28O6S_1___Androgenic<br>Steroids_Lipid                                    |  |
| 28 | 1_1_1_enyl_palmitoyl_2_palmitoyl_GPC<br>P_16_0_16_0___Plasmalogen_Lipid                   | taurochenodeoxycholic acid<br>3_sulfate_Secondary Bile Acid<br>Metabolism_Lipid                            |  |
| 29 | X_19141_NA_NA                                                                             | sphingomyelin_d18_1_20_0_<br>d16_1_22_0___Sphingomyelins_Lipid                                             |  |
| 30 | X_21467_NA_NA                                                                             | 3_4_hydroxyphenyl_lactate<br>_HPLA___Tyrosine Metabolism_Amino<br>Acid                                     |  |
| 31 | X_21470_NA_NA                                                                             | tricosanoyl sphingomyelin<br>_d18_1_23_0___Sphingomyelins_Lipi<br>d                                        |  |
| 32 | X_21471_NA_NA                                                                             | isovalerate_C5___Leucine_Isoleucine<br>and Valine Metabolism_Amino Acid                                    |  |
| 33 | alpha_hydroxyisovalerate_Leucine_<br>Isoleucine and Valine Metabolism_Amino<br>Acid       | sphingomyelin_d18_2_23_0_<br>d18_1_23_1_<br>d17_1_24_1___Sphingomyelins_Lipid                              |  |
| 34 | N_acetylglucosamine_N_acetylgalactosami<br>ne_Aminosugar Metabolism_Carbohydrate          | dihomo_linoleoylcarnitine<br>_C20_2___Fatty Acid Metabolism<br>_Acyl Carnitine_<br>Polyunsaturated___Lipid |  |
| 35 | 3_methylglutaryl carnitine_2___Leucine_<br>Isoleucine and Valine Metabolism_Amino<br>Acid | X_14939_NA_NA                                                                                              |  |
| 36 | X_11299_NA_NA                                                                             | sphingomyelin_d17_2_16_0_<br>d18_2_15_0___Sphingomyelins_Lipid                                             |  |
| 37 | X_11372_NA_NA                                                                             | tetradecanedioate_C14___Fatty Acid_<br>Dicarboxylate_Lipid                                                 |  |
| 38 | X_11470_NA_NA                                                                             | N2_N2_dimethylguanosine_Purine<br>Metabolism_Guanine<br>containing_Nucleotide                              |  |
| 39 | X_11478_NA_NA                                                                             | 1_linoleoyl_2_arachidonoyl_GPC<br>_18_2_20_4n6___Phosphatidylcholin<br>e_PC___Lipid                        |  |
| 40 | X_17654_NA_NA                                                                             | 1_palmitoyl_2_oleoyl_GPC<br>_16_0_18_1___Phosphatidylcholine<br>PC___Lipid                                 |  |
| 41 | X_21736_NA_NA                                                                             | 1_1_enyl_palmitoyl_2_oleoyl_GPE<br>P_16_0_18_1___Plasmalogen_Lipid                                         |  |
| 42 | 1_dihomo_linolenylglycerol<br>_20_3___Monoacylglycerol_Lipid                              | ceramide_d18_1_14_0_<br>d16_1_16_0___Ceramides_Lipid                                                       |  |
| 43 | X_17351_NA_NA                                                                             | X_23997_NA_NA                                                                                              |  |
| 44 | X_16397_NA_NA                                                                             | 1_1_enyl_palmitoyl_GPC<br>P_16_0___Lysoplasmalogen_Lipid                                                   |  |
| 45 | X_16580_NA_NA                                                                             | 2_oleoylglycerol<br>_18_1___Monoacylglycerol_Lipid                                                         |  |
| 46 | bilirubin_E_Z or Z_E___Hemoglobin and<br>Porphyrin Metabolism_Cofactors and<br>Vitamins   | guanidinoacetate_Creatine<br>Metabolism_Amino Acid                                                         |  |
| 47 | X_12026_NA_NA                                                                             | N1_methylinosine_Purine<br>Metabolism_<br>_Hypo_Xanthine_Inosine<br>containing_Nucleotide                  |  |
| 48 | X_12221_NA_NA                                                                             | 2_hydroxy_3_methylvalerate_Leucine<br>_Isoleucine and Valine<br>Metabolism_Amino Acid                      |  |
| 49 | X_12906_NA_NA                                                                             | X_21448_NA_NA                                                                                              |  |
| 50 | X_13553_NA_NA                                                                             | 4_hydroxy_2_oxoglutaric acid_Fatty<br>Acid_Dicarboxylate_Lipid                                             |  |

|    |                                                                                                      |                                                                                       |  |
|----|------------------------------------------------------------------------------------------------------|---------------------------------------------------------------------------------------|--|
| 51 | X_17357_NA_NA                                                                                        | 3_methoxytyrosine_Tyrosine Metabolism_Amino Acid                                      |  |
| 52 | X_18899_NA_NA                                                                                        | urate_Purine Metabolism_Hypo_Xanthine_Inosine containing_Nucleotide                   |  |
| 53 | 1_1_enyl_stearoyl_2_linoleoyl_GPE_P_18_0_18_2__Plasmalogen_Lipid                                     | sphingomyelin_d18_0_18_0_d19_0_17_0__Dihydrosphingomyelins_Lipid                      |  |
| 54 | X_21448_NA_NA                                                                                        | palmitoyl sphingomyelin_d18_1_16_0__Sphingomyelins_Lipid                              |  |
| 55 | cysteinylglycine disulfide__Glutathione Metabolism_Amino Acid                                        | tiglyl carnitine_C5__Leucine_Isoleucine and Valine Metabolism_Amino Acid              |  |
| 56 | X_24947_NA_NA                                                                                        | 1_arachidonoyl_GPI_20_4__Lysophospholipid_Lipid                                       |  |
| 57 | X_24951_NA_NA                                                                                        | 1_1_enyl_stearoyl_2_linoleoyl_GPE_P_18_0_18_2__Plasmalogen_Lipid                      |  |
| 58 | uridine_Pyrimidine Metabolism_Uracil containing_Nucleotide                                           | 5_hydroxylysine_Lysine Metabolism_Amino Acid                                          |  |
| 59 | nisinate_24_6n3__Long Chain Polyunsaturated Fatty Acid_n3 and n6__Lipid                              | N_acetylneuraminate_Aminosugar Metabolism_Carbohydrate                                |  |
| 60 | N_1__N_8__acetylspermidine_Polyamine Metabolism_Amino Acid                                           | isoleucine_Leucine_Isoleucine and Valine Metabolism_Amino Acid                        |  |
| 61 | glycine_Glycine_Serine and Threonine Metabolism_Amino Acid                                           | X_21471_NA_NA                                                                         |  |
| 62 | histidine_Histidine Metabolism_Amino Acid                                                            | kynurenate_Tryptophan Metabolism_Amino Acid                                           |  |
| 63 | hypotaurine_Methionine_Cysteine_SAM and Taurine Metabolism_Amino Acid                                | X_24947_NA_NA                                                                         |  |
| 64 | leucine_Leucine_Isoleucine and Valine Metabolism_Amino Acid                                          | palmitoyl_sphingosine_phosphoethanolamine_d18_1_16_0__Ceramide PEs_Lipid              |  |
| 65 | dihydroorotate_Pyrimidine Metabolism_Orotate containing_Nucleotide                                   | linoleoylcarnitine_C18_2__Fatty Acid Metabolism_Acyl Carnitine_Polyunsaturated__Lipid |  |
| 66 | gamma_glutamylcitrulline__Gamma_glutamyl Amino Acid_Peptide                                          | sphingomyelin_d18_2_24_2__Sphingomyelins_Lipid                                        |  |
| 67 | N_oleoylserine_Endocannabinoid_Lipid                                                                 | N_oleoylserine_Endocannabinoid_Lipid                                                  |  |
| 68 | glycine conjugate of C10H14O2_1__Partially Characterized Molecules_Partially Characterized Molecules | 1_linolenoyl_GPC_18_3__Lysophospholipid_Lipid                                         |  |
